# Supplementary material
Source: PubMed Central journal article supplement (PMC1773054)
Supplement: NIHMS14318-supplement-01.pdf [file NIHMS14318-supplement-01.pdf]

## 17 PRINTED PAGES

### Protein and peptide identifications combining all three YS40 phage lysate MudPIT analyses.

Multiple loci are grouped together if each is identified by the same set of peptides. Loci are shown in order of decreasing sequence coverage. Each locus name is followed by the number of peptides, the number of spectrum copies present for this protein, the sequence coverage (what percentage of the residues are represented in observed peptides), length of the amino acid sequence, molecular weight, approximate pI, and descriptive name.

The peptide identifications are shown below the protein to which they belong. The information includes whether or not the peptide sequence is unique to this locus (indicated by an asterisk at the start of the line), the spectrum file name (the last number being the precursor ion charge state), the XCorr and DeltCN scores, the observed and calculated M+H+ masses, the rank by preliminary scoring, the preliminary score itself, the percentage of ions expected that were found, the number of times this peptide was identified, and the sequence of this peptide. The peptides are listed in the order in which they align to the full protein sequence.

| Criteria sets:                           |             |
|------------------------------------------|-------------|
| Minimum +1 XCorr                         | 1.8         |
| Minimum +2 XCorr                         | 2.5         |
| Minimum +3 XCorr                         | 3.5         |
| Minimum DeltCN                           | 0.11        |
| Minimum charge state                     | 1           |
| Maximum charge state                     | 3           |
| Maximum Sp rank                          | 10          |
| Tryptic status requirement               | Full        |
| Multiple, ambiguous IDs allowed          | FALSE       |
| Minimum sequence length                  | 7           |
| Maximum sequence length                  | 100         |
| Purge duplicate peptides by protein      | XCorr       |
| Include only loci with unique peptide    | FALSE       |
| Remove subset proteins                   | TRUE        |
| Exclude protein names matching           | Contaminant |
| Minimum redundancy for low coverage loci | 10          |
| Minimum peptides per locus               | 1           |

| Locus           | Spectrum        |        | Sequence | Length  | MolWt    | pI                 | Validation |                                                       | Descriptive Name                                     |            |                                                         |
|-----------------|-----------------|--------|----------|---------|----------|--------------------|------------|-------------------------------------------------------|------------------------------------------------------|------------|---------------------------------------------------------|
|                 | Sequence Count  | Count  | Coverage |         |          |                    | Status     |                                                       |                                                      |            |                                                         |
| Unique          | FileName        | XCorr  | DeltCN   | M+H+    | CalcM+H+ | TotalInten<br>sity | SpRank     | SpScore                                               | IonPropo<br>rtion                                    | ndanc<br>y | Sequence                                                |
| gij5000000066   | 13              | 86     | 69.50%   | 246     | 27366    | 5.1                | U          |                                                       | Translation: 56362..57102 (reverse), 247 amino acids |            |                                                         |
| *               | 304.2806.2807.1 | 3.2167 | 0.1846   | 1469.25 | 1469.721 | 8916.3             | 1          | 761                                                   | 58.3                                                 | 9          | K.TSQFAEYLLIGVK.T                                       |
| *               | 207.2752.2752.2 | 4.5773 | 0.4601   | 1469.52 | 1469.721 | 8519.9             | 1          | 1769.4                                                | 79.2                                                 | 4          | K.TSQFAEYLLIGVK.T                                       |
| *               | 305.2994.2994.2 | 4.345  | 0.5222   | 1470.14 | 1469.721 | 7412               | 1          | 1730.7                                                | 79.2                                                 | 19         | K.TSQFAEYLLIGVK.T                                       |
| *               | 303.4049.4049.2 | 4.087  | 0.3865   | 2514.57 | 2511.939 | 4720.3             | 1          | 698.7                                                 | 54.5                                                 | 8          | R.TVIGTPIPIFVPGFYDGSITMER.A                             |
| *               | 204.2287.2287.2 | 2.7828 | 0.1577   | 1021.3  | 1021.245 | 5231.6             | 4          | 793.3                                                 | 81.2                                                 | 1          | R.ATILLQSFK.N                                           |
| *               | 303.3302.3302.2 | 5.4846 | 0.5244   | 2351.27 | 2352.667 | 8277.4             | 1          | 1715.6                                                | 60                                                   | 7          | K.NGVNINPLLAYSSEIYMPEAR.G                               |
| *               | 302.3550.3550.3 | 3.9243 | 0.4388   | 2352.84 | 2352.667 | 7999.6             | 1          | 964.7                                                 | 33.8                                                 | 2          | K.NGVNINPLLAYSSEIYMPEAR.G<br>K.RVELPSDVNGTLPNDFLSSNTTFY |
| *               | 305.3418.3418.3 | 7.3459 | 0.5711   | 3346.37 | 3347.665 | 8361.9             | 1          | 1853.3                                                | 33.6                                                 | 19         | YVSGR.E                                                 |
| *               | 307.3394.3394.2 | 3.1239 | 0.3319   | 1367.03 | 1367.717 | 2961.8             | 1          | 558.7                                                 | 81.8                                                 | 1          | K.YIPGFLFVVALK.D                                        |
| *               | 307.3605.3606.1 | 2.342  | 0.1576   | 1367.36 | 1367.717 | 5718.6             | 1          | 886.8                                                 | 72.7                                                 | 2          | K.YIPGFLFVVALK.D                                        |
| *               | 304.2667.2667.2 | 3.8759 | 0.3975   | 1122.15 | 1122.371 | 5559.6             | 1          | 1346.8                                                | 94.4                                                 | 5          | R.NAGLYLAML.R.D                                         |
| *               | 307.0359.0359.2 | 5.8981 | 0.4715   | 2414.99 | 2414.675 | 7528.2             | 1          | 1491.9                                                | 54.8                                                 | 8          | R.DFSVSYSENAILLENITALAR.P<br>R.PLYNSGWYQVLADTFNTGASFGYI |
| *               | 307.3369.3369.3 | 4.9819 | 0.4921   | 3525.79 | 3526.886 | 13348              | 1          | 1337.9                                                | 25                                                   | 1          | YSDPHKL.-                                               |
| gij55981452 ref | 14              | 53     | 62.30%   | 228     | 25667    | 6.4                | U          | conserved putative protein [Thermus thermophilus HB8] |                                                      |            |                                                         |
| *               | 304.2346.2346.2 | 3.3981 | 0.4179   | 1133.03 | 1133.252 | 7553.8             | 1          | 1331.8                                                | 87.5                                                 | 5          | K.SRDYAAFFR.I<br>R.ILSE AHLPTAYVPGPQD APIWEYLR.         |
| *               | 303.3564.3565.2 | 3.7592 | 0.4794   | 2837.75 | 2838.235 | 4854.3             | 1          | 690.9                                                 | 45.8                                                 | 2          | E<br>R.ILSE AHLPTAYVPGPQD APIWEYLR.                     |
| *               | 302.3949.3949.3 | 3.7679 | 0.3519   | 2838.82 | 2838.235 | 5604.5             | 1          | 905.6                                                 | 34.4                                                 | 1          | E                                                       |
| *               | 305.2782.2782.1 | 2.4867 | 0.3561   | 1336    | 1337.48  | 3949.8             | 1          | 261.4                                                 | 66.7                                                 | 1          | R.NVHETFTFWR.G                                          |
| *               | 305.2748.2750.2 | 2.9675 | 0.1102   | 1336.9  | 1337.48  | 6499.7             | 1          | 839.1                                                 | 83.3                                                 | 1          | R.NVHETFTFWR.G<br>R.GPYLVAGVGG EIADEGEPEEHEAL           |
| *               | 303.2962.2962.3 | 4.8814 | 0.44     | 2594.44 | 2595.782 | 6640.3             | 1          | 738.4                                                 | 30.2                                                 | 2          | R.Y<br>R.GPYLVAGVGG EIADEGEPEEHEAL                      |
| *               | 307.2983.2983.3 | 5.6189 | 0.5178   | 3732.11 | 3732.057 | 5361.4             | 1          | 1069.6                                                | 28.8                                                 | 19         | RYPAWVAEYR.L                                            |
| *               | 305.2888.2888.1 | 2.4189 | 0.2704   | 1433.51 | 1434.742 | 4261.6             | 2          | 302.6                                                 | 60                                                   | 2          | K.IFLFHTMPYHK.G                                         |
| *               | 306.2753.2754.2 | 4.3548 | 0.3667   | 1436.17 | 1434.742 | 9101.8             | 1          | 1669.5                                                | 85                                                   | 8          | K.IFLFHTMPYHK.G                                         |
| *               | 304.2020.2022.2 | 4.6384 | 0.4868   | 1632.2  | 1632.817 | 7731.5             | 1          | 1425.6                                                | 71.4                                                 | 1          | K.GLNEQGSHEVAHLIK.T                                     |
| *               | 306.2821.2821.1 | 2.9453 | 0.4164   | 1261.25 | 1262.538 | 5105.4             | 1          | 536.3                                                 | 59.1                                                 | 2          | K.THNP LLVLVAGK.G                                       |
| *               | 305.2887.2887.2 | 3.2378 | 0.4551   | 1262.28 | 1262.538 | 4636.1             | 1          | 817.3                                                 | 77.3                                                 | 4          | K.THNP LLVLVAGK.G<br>K.HEMLGASWVVVPGDLSEGEYSLLD         |
| *               | 305.4434.4434.3 | 5.7474 | 0.4744   | 2873.54 | 2874.238 | 8016.8             | 1          | 1645.4                                                | 38                                                   | 4          | LR.A<br>K.HEMLGASWVVVPGDLSEGEYSLLD                      |
| *               | 305.4480.4480.2 | 3.8355 | 0.3986   | 2873.83 | 2874.238 | 4329.2             | 1          | 735.1                                                 | 48                                                   | 1          | LR.A                                                    |
| gij55981644 ref | 13              | 123    | 61.10%   | 162     | 17557    | 10.1               | U          | 30S ribosomal protein S5 [Thermus thermophilus HB8]   |                                                      |            |                                                         |
| *               | 107.2472.2472.2 | 4.0715 | 0.3512   | 1033.38 | 1033.216 | 6547.8             | 1          | 1550.4                                                | 94.4                                                 | 7          | R.FGALVVVGDR.Q                                          |

|               |                 |        |        |         |          |        |                                                      |        |      |    |                                                       |
|---------------|-----------------|--------|--------|---------|----------|--------|------------------------------------------------------|--------|------|----|-------------------------------------------------------|
| *             | 305.2506.2506.2 | 4.1588 | 0.4313 | 1710.3  | 1711.057 | 5847.6 | 1                                                    | 1045.3 | 62.5 | 2  | R.VGLGFGKAPEVPLAVQK.A<br>R.RNMVEVPLQNGTIPHEIEVEFGASK. |
| *             | 305.3815.3815.2 | 4.2994 | 0.4363 | 2795.8  | 2796.171 | 8212.9 | 1                                                    | 985.1  | 43.8 | 2  | I<br>R.RNMVEVPLQNGTIPHEIEVEFGASK.                     |
| *             | 305.3966.3966.3 | 5.5878 | 0.5186 | 2798.14 | 2796.171 | 7961.5 | 1                                                    | 1773.2 | 39.6 | 5  | I                                                     |
| *             | 303.3230.3230.2 | 4.9952 | 0.4903 | 2637.56 | 2639.983 | 4839   | 1                                                    | 750.3  | 50   | 17 | R.NMVEVPLQNGTIPHEIEVEFGASK.I                          |
| *             | 302.3789.3789.3 | 3.9345 | 0.247  | 2639.9  | 2639.983 | 4045.4 | 1                                                    | 515.9  | 31.5 | 2  | R.NMVEVPLQNGTIPHEIEVEFGASK.I                          |
| *             | 303.2248.2250.3 | 4.2903 | 0.3179 | 1787.68 | 1788.187 | 8101.5 | 1                                                    | 1205.4 | 38.9 | 6  | K.IVLKPAAPGTGVIAGAVPR.A                               |
| *             | 302.0106.0106.2 | 4.0888 | 0.4457 | 1788.41 | 1788.187 | 3126.4 | 1                                                    | 791.2  | 72.2 | 9  | K.IVLKPAAPGTGVIAGAVPR.A                               |
| *             | 303.1818.1818.2 | 4.5092 | 0.5873 | 1333.96 | 1334.561 | 5250   | 1                                                    | 1530   | 85.7 | 3  | K.PAAPGTGVIAGAVPR.A                                   |
| *             | 302.3493.3493.2 | 5.1583 | 0.4915 | 1457.41 | 1457.751 | 6246.7 | 1                                                    | 1785.9 | 84.6 | 40 | R.AILELAGVTDILTK.E                                    |
| *             | 304.3167.3167.1 | 3.7747 | 0.4672 | 1457.42 | 1457.751 | 8905.7 | 1                                                    | 1143.3 | 65.4 | 26 | R.AILELAGVTDILTK.E                                    |
| *             | 207.2930.2930.2 | 2.719  | 0.2823 | 1458.27 | 1457.751 | 8135.1 | 1                                                    | 885.7  | 61.5 | 1  | R.AILELAGVTDILTK.E                                    |
| *             | 303.3376.3376.2 | 4.3048 | 0.4331 | 1577.02 | 1577.839 | 6466.8 | 1                                                    | 1419.3 | 76.9 | 3  | R.NPINIAYATMEALR.Q                                    |
| gj 5000000072 | 43              | 615    | 59.60% | 470     | 52303    | 6.1 U  | Translation: 61756..63168 (reverse), 471 amino acids |        |      |    |                                                       |
| *             | 203.2127.2127.2 | 4.3439 | 0.4513 | 1428.67 | 1429.573 | 9458.1 | 1                                                    | 1962   | 76.9 | 5  | K.ALNAAGQVAESLER.E                                    |
| *             | 302.2023.2023.1 | 3.2213 | 0.4815 | 1429.16 | 1429.573 | 3743.1 | 1                                                    | 230.7  | 53.8 | 2  | K.ALNAAGQVAESLER.E                                    |
| *             | 303.2046.2046.2 | 4.4839 | 0.45   | 1429.79 | 1429.573 | 7427.8 | 1                                                    | 1957.5 | 84.6 | 9  | K.ALNAAGQVAESLER.E<br>K.ALNAAGQVAESLEREDLEPEVTQLN     |
| *             | 303.4392.4392.3 | 7.6085 | 0.5034 | 3992.74 | 3994.442 | 7945.9 | 1                                                    | 1110.1 | 25.7 | 28 | VLDTPLTDLLSK.N                                        |
| *             | 107.2971.2972.2 | 5.1243 | 0.5659 | 2584.68 | 2583.893 | 9210.4 | 1                                                    | 1068.7 | 45.5 | 8  | R.EDLEPEVTQLNVLDTPLTDLLSK.N                           |
| *             | 302.0015.0015.1 | 2.8422 | 0.327  | 1451.29 | 1452.566 | 5590.2 | 1                                                    | 446.6  | 54.5 | 1  | K.AYEHEYNVVTAR.H                                      |
| *             | 302.0014.0014.2 | 3.839  | 0.4983 | 1451.98 | 1452.566 | 5959.5 | 1                                                    | 1288.1 | 81.8 | 6  | K.AYEHEYNVVTAR.H                                      |
| *             | 107.2284.2284.2 | 3.9082 | 0.4513 | 1452.61 | 1452.566 | 7621.1 | 1                                                    | 1562.7 | 81.8 | 15 | K.AYEHEYNVVTAR.H                                      |
| *             | 207.2326.2326.2 | 3.0532 | 0.1738 | 1407.56 | 1407.615 | 8927.2 | 1                                                    | 745.6  | 58.3 | 3  | K.IGYAAFREGGLPR.T                                     |
| *             | 103.1714.1714.2 | 3.3337 | 0.245  | 916.63  | 916.065  | 2939   | 1                                                    | 657.4  | 92.9 | 2  | R.TVEVNVVR.R                                          |
| *             | 103.1966.1966.2 | 3.4504 | 0.3737 | 1004.37 | 1004.172 | 5693.3 | 1                                                    | 981.8  | 87.5 | 10 | R.ITVTELATR.T                                         |
| *             | 302.2334.2334.1 | 2.7066 | 0.2471 | 1575.09 | 1576.805 | 6376.8 | 1                                                    | 368.9  | 50   | 1  | R.TTQNGVMQIDELVK.R                                    |
| *             | 303.2347.2347.2 | 3.8847 | 0.4721 | 1576.3  | 1576.805 | 5626.1 | 1                                                    | 839.2  | 65.4 | 9  | R.TTQNGVMQIDELVK.R                                    |
| *             | 305.1656.1656.2 | 3.2918 | 0.3646 | 1311.28 | 1311.443 | 3465.3 | 2                                                    | 438.1  | 66.7 | 1  | K.RGAPQNVLDAGGR.P<br>K.RGAPQNVLDAGGRPLSIDLLWEAE       |
| *             | 305.4256.4258.2 | 3.2166 | 0.2985 | 2821.69 | 2822.153 | 7687.7 | 1                                                    | 380.5  | 34   | 7  | SR.V<br>K.RGAPQNVLDAGGRPLSIDLLWEAE                    |
| *             | 306.3293.3294.3 | 5.3951 | 0.4501 | 2823.74 | 2822.153 | 5852.7 | 1                                                    | 1071.6 | 35   | 90 | SR.V<br>R.GAPQNVLDAGGRPLSIDLLWEAES                    |
| *             | 304.4061.4061.3 | 5.1296 | 0.5054 | 2664.8  | 2665.966 | 5653   | 1                                                    | 939.3  | 35.4 | 26 | R.V<br>R.GAPQNVLDAGGRPLSIDLLWEAES                     |
| *             | 305.3734.3735.2 | 3.658  | 0.4413 | 2665.71 | 2665.966 | 5904.3 | 1                                                    | 469.8  | 39.6 | 42 | R.V                                                   |
| *             | 305.4316.4316.2 | 3.6951 | 0.4026 | 1530.04 | 1529.733 | 9755.4 | 1                                                    | 1275.2 | 66.7 | 2  | R.PLSIDLLWEAESR.V                                     |
| *             | 303.3382.3382.3 | 5.2036 | 0.475  | 2157.28 | 2158.459 | 9170   | 1                                                    | 1286.1 | 39.5 | 4  | R.VVSTQAFANPTAVFISYVDK.L                              |
| *             | 303.3580.3580.2 | 7.0644 | 0.5779 | 2158.14 | 2158.459 | 5234.3 | 1                                                    | 1151.5 | 63.2 | 31 | R.VVSTQAFANPTAVFISYVDK.L                              |

|                 |                 |        |        |         |          |        |                                                           |        |      |    |                                                       |
|-----------------|-----------------|--------|--------|---------|----------|--------|-----------------------------------------------------------|--------|------|----|-------------------------------------------------------|
| *               | 305.2922.2922.2 | 4.5913 | 0.4471 | 1439.98 | 1440.642 | 6670.6 | 1                                                         | 1469.3 | 86.4 | 78 | K.LNLQASFYQISR.V                                      |
| *               | 303.2759.2760.1 | 2.879  | 0.2999 | 1440.26 | 1440.642 | 4281.1 | 1                                                         | 314.9  | 63.6 | 11 | K.LNLQASFYQISR.V                                      |
| *               | 305.2819.2819.2 | 3.8085 | 0.4022 | 1648.49 | 1647.875 | 4567.5 | 1                                                         | 1092.2 | 73.3 | 2  | R.RAGLLGADAQSYIGVR.G                                  |
| *               | 302.0207.0211.1 | 3.5304 | 0.3951 | 1491.39 | 1491.687 | 2853.4 | 1                                                         | 345.9  | 60.7 | 12 | R.AGLLGADAQSYIGVR.G                                   |
| *               | 107.2535.2535.2 | 5.4388 | 0.4831 | 1491.65 | 1491.687 | 7806.7 | 1                                                         | 2111.6 | 78.6 | 4  | R.AGLLGADAQSYIGVR.G                                   |
| *               | 302.2687.2687.2 | 5.4583 | 0.4922 | 1493.53 | 1491.687 | 6472.6 | 1                                                         | 1777.3 | 82.1 | 94 | R.AGLLGADAQSYIGVR.G<br>R.AGLLGADAQSYIGVRGEHSLYPSQ     |
| *               | 305.3835.3835.3 | 4.092  | 0.3638 | 3335.63 | 3335.703 | 9605.7 | 1                                                         | 918.7  | 26.7 | 2  | FLGDFHK.F                                             |
| *               | 302.0200.0202.2 | 4.8604 | 0.4176 | 1863.36 | 1863.039 | 5119.5 | 1                                                         | 932.5  | 70   | 11 | R.GEHSLYPSQFLGDFHK.F                                  |
| *               | 302.0203.0203.3 | 4.8567 | 0.4661 | 1863.6  | 1863.039 | 7562.8 | 1                                                         | 1330.5 | 46.7 | 10 | R.GEHSLYPSQFLGDFHK.F                                  |
| *               | 103.1647.1647.1 | 2.4526 | 0.2985 | 1128.47 | 1129.214 | 9051.9 | 1                                                         | 650.2  | 65   | 2  | K.AANFYGESAAK.Y                                       |
| *               | 103.1642.1642.2 | 2.9026 | 0.2804 | 1129.11 | 1129.214 | 5687.5 | 1                                                         | 468.1  | 65   | 2  | K.AANFYGESAAK.Y                                       |
| *               | 304.2315.2315.2 | 3.9056 | 0.5038 | 1474.23 | 1474.607 | 5070   | 1                                                         | 1597.7 | 87.5 | 12 | K.YIDVYIDSTEAGK.G                                     |
| *               | 103.2110.2110.2 | 3.9138 | 0.4107 | 1475.45 | 1474.607 | 5505.9 | 1                                                         | 1363   | 83.3 | 3  | K.YIDVYIDSTEAGK.G                                     |
| *               | 303.2404.2404.1 | 2.493  | 0.2576 | 1475.5  | 1474.607 | 7818.7 | 1                                                         | 1014.2 | 66.7 | 4  | K.YIDVYIDSTEAGK.G                                     |
| *               | 306.2767.2769.1 | 2.7693 | 0.3457 | 1188.34 | 1189.403 | 3741.7 | 1                                                         | 523.5  | 66.7 | 1  | R.FQFHGLVNVK.W                                        |
| *               | 306.2771.2773.2 | 3.3894 | 0.3259 | 1189.07 | 1189.403 | 5096.5 | 1                                                         | 1152   | 88.9 | 8  | R.FQFHGLVNVK.W<br>K.VSTVNGDFTWIDDGHETVTTPSGV          |
| *               | 302.2814.2815.3 | 5.5855 | 0.5239 | 2855.61 | 2855.047 | 5162.7 | 1                                                         | 931    | 34   | 20 | YR.W<br>K.VSTVNGDFTWIDDGHETVTTPSGV                    |
| *               | 307.2691.2693.2 | 4.3149 | 0.4835 | 2855.67 | 2855.047 | 8708.7 | 1                                                         | 683.1  | 36   | 11 | YR.W                                                  |
| *               | 305.2735.2738.1 | 3.63   | 0.3916 | 1553.32 | 1553.844 | 5609.4 | 1                                                         | 635.8  | 58.3 | 7  | R.LPPALTHDYVIWK.V                                     |
| *               | 302.0150.0150.2 | 4.2732 | 0.5303 | 1554    | 1553.844 | 5699.7 | 1                                                         | 1164.5 | 79.2 | 10 | R.LPPALTHDYVIWK.V                                     |
| *               | 307.3309.3309.2 | 2.8342 | 0.1392 | 2635.82 | 2634.05  | 9126.9 | 1                                                         | 480.6  | 34.8 | 1  | K.VASVFSRAPEFNFLIVNVGQEPIV.-                          |
| *               | 305.4474.4474.2 | 4.6123 | 0.4124 | 1886.15 | 1887.186 | 8469.9 | 1                                                         | 1054.5 | 56.2 | 8  | R.APEFNFLIVNVGQEPIV.-                                 |
| gj 55980144 ref | 3               | 12     | 57.50% | 73      | 8185     | 8.6 U  | cold shock protein [Thermus thermophilus HB8]             |        |      |    |                                                       |
| *               | 304.2728.2728.3 | 6.2545 | 0.5053 | 2603.59 | 2603.85  | 7371.2 | 1                                                         | 1380   | 37.5 | 2  | K.GYGFIEREGDTDVVFVHYTAINAK.G                          |
| *               | 302.2506.2506.2 | 4.4898 | 0.3256 | 1763.12 | 1762.914 | 7779.5 | 1                                                         | 2022.7 | 76.7 | 4  | R.TLNEGDIVTFDVEPGR.N                                  |
| *               | 302.2435.2435.2 | 3.956  | 0.4155 | 2063.78 | 2062.244 | 8277.3 | 1                                                         | 899.1  | 50   | 6  | R.TLNEGDIVTFDVEPGRNGK.G                               |
| gj 55980214 ref | 5               | 61     | 52.50% | 101     | 11973    | 6.9 U  | 30S ribosomal protein S6 (TS9) [Thermus thermophilus HB8] |        |      |    |                                                       |
| *               | 304.2774.2775.2 | 5.6053 | 0.4957 | 2457.93 | 2457.789 | 6556.8 | 1                                                         | 1279.1 | 60   | 39 | R.RYEVNIVLNPQLDQSQLALEK.E                             |
| *               | 107.2641.2643.2 | 5.0769 | 0.4414 | 2301.62 | 2301.602 | 5344   | 1                                                         | 871.7  | 57.9 | 9  | R.YEVNIVLNPQLDQSQLALEK.E                              |
| *               | 302.3355.3355.2 | 5.0788 | 0.5509 | 2173.06 | 2174.392 | 6708.2 | 1                                                         | 1664.5 | 65.6 | 10 | K.DPQQGYFLWYQVEMPEDR.V<br>K.DPQQGYFLWYQVEMPEDRVNDLAR. |
| *               | 303.3254.3254.3 | 4.3517 | 0.496  | 2843.99 | 2843.143 | 5656.3 | 1                                                         | 809.9  | 33   | 2  | E                                                     |
| *               | 102.2450.2450.1 | 1.9232 | 0.2693 | 977.27  | 977.062  | 5641.7 | 1                                                         | 438.1  | 62.5 | 1  | K.SQEPFLANA.-                                         |
| gj 55981647 ref | 10              | 22     | 48.60% | 138     | 15837    | 10.3 U | 30S ribosomal protein S8 [Thermus thermophilus HB8]       |        |      |    |                                                       |
| *               | 205.3152.3152.2 | 2.5388 | 0.3243 | 1378.1  | 1377.657 | 5504.2 | 1                                                         | 720.7  | 68.2 | 1  | -.MLTDPIADMLTR.I                                      |
| *               | 103.1499.1499.2 | 3.4565 | 0.3759 | 1352.33 | 1352.487 | 6439.1 | 1                                                         | 948.6  | 72.7 | 2  | R.VYKESTDVPASR.F                                      |
| *               | 107.2305.2308.1 | 2.2424 | 0.1481 | 934.6   | 935.111  | 4110.2 | 1                                                         | 428    | 83.3 | 1  | R.FKEEILR.I                                           |
| *               | 107.2292.2292.1 | 2.1454 | 0.2078 | 1161.67 | 1162.331 | 3248.6 | 6                                                         | 284.9  | 61.1 | 1  | R.VDVGKPYLR.V                                         |
| *               | 107.2279.2279.2 | 2.8845 | 0.2918 | 1162.5  | 1162.331 | 5529.8 | 1                                                         | 926.7  | 88.9 | 2  | R.VDVGKPYLR.V                                         |
| *               | 306.2225.2225.2 | 2.6548 | 0.185  | 813.82  | 813.978  | 3951   | 1                                                         | 483.9  | 91.7 | 1  | R.RISKPGR.R                                           |

|               |                 |        |        |         |          |        |                                                      |        |      |    |                                                          |
|---------------|-----------------|--------|--------|---------|----------|--------|------------------------------------------------------|--------|------|----|----------------------------------------------------------|
| *             | 107.2229.2229.2 | 2.9135 | 0.1935 | 821.11  | 821.01   | 3590.9 | 7                                                    | 660    | 100  | 1  | R.RVYVGVK.E                                              |
| *             | 306.2726.2726.2 | 3.5532 | 0.4426 | 1216.52 | 1216.467 | 7010.8 | 1                                                    | 1250.5 | 81.8 | 4  | R.RGLGAILSTSK.G                                          |
| *             | 107.2547.2547.1 | 2.9529 | 0.1888 | 1059.64 | 1060.279 | 8493.9 | 3                                                    | 634.3  | 65   | 2  | R.GLGAILSTSK.G                                           |
| *             | 205.2368.2368.2 | 4.344  | 0.3228 | 1060.34 | 1060.279 | 5505   | 1                                                    | 1196.6 | 85   | 7  | R.GLGAILSTSK.G                                           |
| gj 5000000018 | 17              | 207    | 48.40% | 411     | 45738    | 5.1 U  | Translation: 17108..18343 (reverse), 412 amino acids |        |      |    |                                                          |
| *             | 302.0324.0326.2 | 4.3955 | 0.465  | 2626.32 | 2626.966 | 5450.5 | 1                                                    | 1001   | 50   | 14 | R.LVFGGSTATPVFDATPDLSNFELVK                              |
| *             | 303.3030.3030.1 | 1.9155 | 0.2375 | 956.58  | 957.247  | 5914.8 | 3                                                    | 392.8  | 71.4 | 1  | R.VVPLLLFR.V                                             |
| *             | 303.2306.2306.2 | 4.9462 | 0.5564 | 1705.01 | 1704.89  | 8168.9 | 1                                                    | 1871   | 71.9 | 10 | K.WITVASACAGSGAPT.VR.F                                   |
| *             | 302.3889.3889.2 | 5.5679 | 0.5195 | 1718.41 | 1718.86  | 5778.6 | 1                                                    | 1684.9 | 88.5 | 60 | R.FVDNDIYLDVDFSR.Y                                       |
| *             | 302.2995.2995.3 | 6.1622 | 0.5595 | 2775.05 | 2777.04  | 7651.6 | 1                                                    | 2174   | 41.3 | 34 | R.YITHDSVALQNDEHLFGMSNTLNR.<br>G                         |
| *             | 304.2623.2623.2 | 6.4143 | 0.5757 | 2776.03 | 2777.04  | 11030  | 1                                                    | 2166.2 | 52.2 | 13 | R.YITHDSVALQNDEHLFGMSNTLNR.<br>G                         |
| *             | 205.2816.2816.2 | 3.2273 | 0.4203 | 1135.04 | 1135.305 | 5928.2 | 1                                                    | 918.4  | 77.8 | 4  | R.GSFFYSVLSK.V                                           |
| *             | 302.0314.0314.3 | 3.6108 | 0.307  | 3119.95 | 3118.58  | 4377.4 | 1                                                    | 325.5  | 28   | 1  | K.YQIIPFYDTLPKPMNGNYTVFGRPE<br>R.L                       |
| *             | 305.1958.1958.2 | 3.0931 | 0.2195 | 1638.46 | 1638.841 | 4770   | 1                                                    | 585.6  | 69.2 | 3  | K.PMNGNYTVFGRPER.L                                       |
| *             | 302.2275.2275.1 | 2.9742 | 0.366  | 1448.29 | 1449.647 | 7937   | 1                                                    | 575.5  | 53.8 | 5  | R.LVDFNNAVSGAVSK.V                                       |
| *             | 203.2383.2383.2 | 5.0651 | 0.4541 | 1449.36 | 1449.647 | 8032.5 | 1                                                    | 2015.5 | 84.6 | 2  | R.LVDFNNAVSGAVSK.V                                       |
| *             | 304.2292.2294.2 | 5.0162 | 0.496  | 1450.96 | 1449.647 | 6390.2 | 1                                                    | 1683   | 84.6 | 12 | R.LVDFNNAVSGAVSK.V                                       |
| *             | 302.1746.1746.2 | 2.8396 | 0.169  | 1117.88 | 1118.316 | 5153.7 | 1                                                    | 773.4  | 75   | 1  | K.VAALISDTTVK.T                                          |
| *             | 303.3074.3074.2 | 4.4852 | 0.5582 | 2395.2  | 2396.656 | 6177.2 | 1                                                    | 937.8  | 52.5 | 33 | K.AISVPVTFGDTFDYTTLEYQK.A                                |
| *             | 302.3179.3179.3 | 4.7604 | 0.4944 | 2396.62 | 2396.656 | 6429.8 | 1                                                    | 771.7  | 35   | 4  | K.AISVPVTFGDTFDYTTLEYQK.A<br>K.SYVTGPYGAIPVYDDNGNLIGWYSD |
| *             | 302.3174.3174.2 | 4.292  | 0.4885 | 3186.43 | 3187.446 | 7640.2 | 1                                                    | 689.4  | 35.7 | 9  | AYSK.-<br>K.SYVTGPYGAIPVYDDNGNLIGWYSD                    |
| *             | 206.2813.2813.3 | 3.7412 | 0.4752 | 3188.13 | 3187.446 | 5864.8 | 1                                                    | 1111.4 | 33   | 1  | AYSK.-                                                   |
| gj 5000000073 | 25              | 283    | 46.90% | 544     | 61500    | 4.7 U  | Translation: 63204..64838 (reverse), 545 amino acids |        |      |    |                                                          |
| *             | 304.1656.1656.2 | 2.761  | 0.181  | 923.74  | 924.172  | 3744.3 | 5                                                    | 328.9  | 78.6 | 1  | K.VPEIKPIK.G                                             |
| *             | 306.2719.2721.2 | 3.8187 | 0.368  | 1632.29 | 1631.999 | 6522.7 | 1                                                    | 666.9  | 65.4 | 2  | K.VPEIKPIKGEFFVK.R<br>K.NLELPGDWVIFGVASTPSIDLVND         |
| *             | 307.0388.0388.3 | 5.4101 | 0.3627 | 3340.97 | 3340.841 | 5307.4 | 1                                                    | 679.3  | 28.3 | 4  | AILDVK.Y                                                 |
| *             | 302.3118.3118.2 | 5.3946 | 0.6202 | 1721.04 | 1721.821 | 8117.2 | 1                                                    | 1780.9 | 75   | 9  | K.YTFGDSLEEFVNSGR.I                                      |
| *             | 303.3174.3174.2 | 4.7048 | 0.5783 | 2191.71 | 2191.489 | 7097.8 | 1                                                    | 1449.3 | 65.8 | 3  | K.HPDIDVPIGIPIAAEIYDNK.L                                 |
| *             | 304.1764.1764.2 | 3.0663 | 0.4956 | 1405.82 | 1405.51  | 8234.9 | 1                                                    | 863    | 68.2 | 1  | K.HLQSADDRFTSK.I                                         |
| *             | 306.2697.2698.2 | 3.671  | 0.3968 | 1594.66 | 1593.951 | 4634.2 | 1                                                    | 555.7  | 60   | 3  | K.IGLSIGAIPKPKQTK.V                                      |
| *             | 302.0298.0298.2 | 5.0791 | 0.5471 | 2038.12 | 2038.348 | 4802.8 | 1                                                    | 945.8  | 67.6 | 5  | R.LYEVSITGQPINIDTFVK.V<br>K.NPEEEKQEGVLEALEEEVQADASE     |
| *             | 302.3306.3306.3 | 6.5767 | 0.5545 | 3333.92 | 3333.408 | 10389  | 1                                                    | 2590.4 | 34.5 | 8  | DASEEK.Q<br>K.NPEEEKQEGVLEALEEEVQADASE                   |
| *             | 302.3799.3799.3 | 4.9612 | 0.2512 | 3848.77 | 3850.021 | 9451   | 2                                                    | 600.2  | 21.2 | 3  | DASEEKQEMK.Q                                             |

|                 |                 |        |        |         |          |        |                                                      |        |      |     |                                                            |
|-----------------|-----------------|--------|--------|---------|----------|--------|------------------------------------------------------|--------|------|-----|------------------------------------------------------------|
| *               | 302.3513.3513.2 | 6.4044 | 0.5045 | 2604.28 | 2606.667 | 10247  | 1                                                    | 2288.2 | 56.5 | 20  | K.QEGVLEALEEEVQADASEDASEEK.<br>Q                           |
| *               | 303.3342.3342.3 | 4.624  | 0.4234 | 3124.31 | 3123.28  | 8399.9 | 1                                                    | 892.7  | 27.8 | 1   | K.QEGVLEALEEEVQADASEDASEEK<br>QEMK.Q                       |
| *               | 305.2428.2428.3 | 5.4692 | 0.3717 | 4390.03 | 4391.435 | 8557.3 | 1                                                    | 889.8  | 21.2 | 10  | K.QDEAQVLDLGDQLQGEASEEPSEED<br>KEEGALEGQNEETQDK.V          |
| *               | 303.1875.1875.2 | 3.3126 | 0.2775 | 1538.11 | 1539.682 | 8361.2 | 1                                                    | 949.3  | 66.7 | 2   | K.VALVQEEVEEHEK.E<br>K.VALVQEEVEEHEKEDEETFNYILDK.          |
| *               | 304.2839.2839.2 | 4.8269 | 0.433  | 3035.26 | 3037.26  | 10362  | 1                                                    | 1122.1 | 41.7 | 48  | L<br>K.VALVQEEVEEHEKEDEETFNYILDK.                          |
| *               | 302.4154.4155.3 | 7.4161 | 0.4907 | 3039.04 | 3037.26  | 8968.4 | 1                                                    | 1787.9 | 36.5 | 101 | L                                                          |
| *               | 302.2292.2292.2 | 3.9726 | 0.3612 | 1515.91 | 1516.601 | 6936.7 | 1                                                    | 1557   | 86.4 | 2   | K.EDEETFNYILDK.L                                           |
| *               | 302.0154.0154.1 | 2.7878 | 0.2986 | 1121.28 | 1122.365 | 7237.4 | 1                                                    | 730.2  | 70   | 3   | K.LSGVLSMLSSK.A                                            |
| *               | 206.2685.2685.1 | 2.5731 | 0.3394 | 1121.51 | 1122.365 | 8349.4 | 1                                                    | 560.8  | 60   | 2   | K.LSGVLSMLSSK.A                                            |
| *               | 303.2607.2607.2 | 3.2837 | 0.1353 | 1122.08 | 1122.365 | 4749.4 | 2                                                    | 771.7  | 75   | 2   | K.LSGVLSMLSSK.A                                            |
| *               | 205.2644.2644.2 | 3.6163 | 0.2684 | 1122.32 | 1122.365 | 5515.2 | 1                                                    | 1129.7 | 85   | 4   | K.LSGVLSMLSSK.A                                            |
| *               | 203.2462.2462.2 | 5.8263 | 0.6376 | 1988.63 | 1990.128 | 7419.9 | 1                                                    | 2538.1 | 75   | 21  | K.APQEESEDAVVSSSLAELK.S                                    |
| *               | 304.2362.2362.2 | 5.6695 | 0.6003 | 1989.1  | 1990.128 | 6906.6 | 1                                                    | 2076.9 | 72.2 | 17  | K.APQEESEDAVVSSSLAELK.S                                    |
| *               | 304.2366.2366.3 | 4.3271 | 0.3308 | 1990.02 | 1990.128 | 7116.3 | 1                                                    | 1059.2 | 37.5 | 5   | K.APQEESEDAVVSSSLAELK.S                                    |
| *               | 203.2448.2450.3 | 4.6296 | 0.3545 | 1990.68 | 1990.128 | 7723.4 | 1                                                    | 1111.6 | 38.9 | 6   | K.APQEESEDAVVSSSLAELK.S                                    |
| gi 55981451 ref | 6               | 66     | 45.10% | 144     | 16233    | 4.9 U  | bacterioferritin [Thermus thermophilus HB8]          |        |      |     |                                                            |
| *               | 303.4004.4004.2 | 4.8429 | 0.5136 | 1510.32 | 1510.687 | 7403.3 | 1                                                    | 1927.7 | 86.4 | 52  | K.EFFLAEIQDEL.R.H                                          |
| *               | 303.3878.3878.1 | 2.3094 | 0.4004 | 1510.38 | 1510.687 | 2455.1 | 1                                                    | 152.7  | 59.1 | 2   | K.EFFLAEIQDEL.R.H                                          |
| *               | 303.1683.1683.2 | 3.5108 | 0.3025 | 929.72  | 930.051  | 6416.4 | 1                                                    | 1493.5 | 100  | 2   | R.HAQFLADK.I                                               |
| *               | 304.1734.1734.3 | 4.2857 | 0.2831 | 2145.05 | 2144.479 | 5479.5 | 1                                                    | 1200.8 | 40.5 | 3   | K.IAALGGKPTTQPAPVPEAATPR.A                                 |
| *               | 302.0016.0016.2 | 5.2198 | 0.5079 | 2145.61 | 2144.479 | 4365.4 | 1                                                    | 735.7  | 57.1 | 3   | K.IAALGGKPTTQPAPVPEAATPR.A                                 |
| *               | 302.3790.3791.2 | 5.8338 | 0.4992 | 2588.94 | 2586.728 | 10014  | 1                                                    | 2027.9 | 56.8 | 4   | K.QAEAYGDYGLANDLQEIISEETR.H                                |
| gi 5000000068   | 18              | 93     | 41.50% | 648     | 71884    | 5.4 U  | Translation: 57775..59721 (reverse), 649 amino acids |        |      |     |                                                            |
| *               | 303.4218.4218.2 | 4.4828 | 0.5117 | 2261.31 | 2261.58  | 8354.8 | 1                                                    | 1061.1 | 47.7 | 4   | K.QINGVGTGIVALLGLAEGGETYK.P<br>K.QINGVGTGIVALLGLAEGGETYKPY |
| *               | 305.4328.4328.2 | 2.9215 | 0.3063 | 2677.48 | 2678.06  | 8967.5 | 1                                                    | 413.1  | 30   | 1   | R.L                                                        |
| *               | 305.3198.3198.2 | 3.6749 | 0.5297 | 1314.14 | 1313.536 | 7660.4 | 1                                                    | 1985.3 | 90.9 | 8   | R.LTSFAEAVSIFK.G                                           |
| *               | 304.1806.1806.2 | 3.1281 | 0.2111 | 964.25  | 964.153  | 5109.5 | 3                                                    | 855.9  | 81.2 | 2   | K.GGPLLEHIK.A                                              |
| *               | 107.2447.2447.2 | 4.6414 | 0.3321 | 1318.62 | 1317.531 | 6624.1 | 1                                                    | 1941.9 | 84.6 | 12  | K.AAFIGGAGEVAVR.I<br>R.IGNPTTASVSIPVAQNTSDTSPANL           |
| *               | 303.2710.2710.3 | 5.3592 | 0.4825 | 3611.94 | 3611.901 | 4902.5 | 1                                                    | 781.6  | 28.7 | 1   | NFVSYEASTR.S                                               |
| *               | 305.2530.2530.2 | 3.019  | 0.3531 | 1198.09 | 1198.367 | 3996.3 | 1                                                    | 446.7  | 77.8 | 3   | K.RGSTLFFVDR.S                                             |
| *               | 305.4682.4682.3 | 5.3679 | 0.396  | 2195.92 | 2197.626 | 7458.2 | 1                                                    | 1391.1 | 36.9 | 7   | R.SIVNAALAAGPAFQTALINLLK.E                                 |
| *               | 305.4718.4719.2 | 5.0075 | 0.4509 | 2198.57 | 2197.626 | 5218.5 | 1                                                    | 954.7  | 57.1 | 16  | R.SIVNAALAAGPAFQTALINLLK.E                                 |
| *               | 304.2782.2782.3 | 6.4533 | 0.4733 | 2379.72 | 2379.678 | 8301.3 | 1                                                    | 2544.3 | 47.5 | 3   | K.DAYTINHLVDTTINPHILATR.I                                  |
| *               | 302.0159.0159.2 | 4.6082 | 0.4671 | 1977.89 | 1977.246 | 7090.4 | 1                                                    | 1221.3 | 61.8 | 2   | K.GIASTFLSHVQTMSQVNR.R<br>R.VGVFGLPAPSPNESVTASEYLYNR.      |
| *               | 302.0164.0166.2 | 5.1811 | 0.5539 | 2567.49 | 2568.846 | 6190   | 1                                                    | 982.1  | 54.3 | 12  | N                                                          |

|                 |                 |        |        |         |          |        |                                                       |        |      |                                                            |
|-----------------|-----------------|--------|--------|---------|----------|--------|-------------------------------------------------------|--------|------|------------------------------------------------------------|
| *               | 303.4090.4090.2 | 3.142  | 0.2496 | 1611.22 | 1610.825 | 6711.2 | 1                                                     | 870.6  | 64.3 | 1 R.NILNTISAMFGGTDR.A                                      |
| *               | 307.3339.3339.2 | 4.8839 | 0.5038 | 2577.16 | 2578.936 | 7157.6 | 1                                                     | 919.7  | 50   | 6 R.IHHNPTTWLGPVTQGFQEFVLR.R                               |
| *               | 307.3534.3534.3 | 7.5897 | 0.5934 | 2579.03 | 2578.936 | 8661.1 | 1                                                     | 3362.9 | 48.8 | 6 R.IHHNPTTWLGPVTQGFQEFVLR.R                               |
| *               | 303.2714.2714.2 | 4.294  | 0.519  | 1547.1  | 1547.751 | 7197.3 | 1                                                     | 1425   | 81.8 | 4 R.RIDDFLQSYVYK.N                                         |
| *               | 206.2754.2754.2 | 4.6114 | 0.5099 | 1407.46 | 1407.65  | 7578.8 | 1                                                     | 1662.7 | 83.3 | 4 K.VYTEALLSNLVGK.Q                                        |
| *               | 307.3194.3194.2 | 2.9825 | 0.2857 | 2028.2  | 2027.324 | 11255  | 1                                                     | 737.9  | 46.7 | 1 K.TVYYYVEFFYQPVTEIK.F                                    |
| gj 5000000166   | 11              | 45     | 40.00% | 497     | 56961    | 4.8 U  | Translation: 148736..150229 (direct), 498 amino acids |        |      |                                                            |
| *               | 303.2779.2779.2 | 4.9902 | 0.5258 | 2453.23 | 2454.66  | 8370   | 1                                                     | 969    | 50   | 4 K.DYWQQIDRPINDEYVGGWAK.L<br>R.IYNDSSYTDQTISPSSSYIGNLEPAT |
| *               | 303.3352.3352.3 | 5.7834 | 0.5578 | 3951.71 | 3954.336 | 5958.6 | 1                                                     | 1021.3 | 28.6 | 3 KFEVLSGLVR.I<br>K.MLSFAPIINIYYPIGFDETSGLPNDAY            |
| *               | 305.0011.0011.3 | 6.2875 | 0.536  | 3780.94 | 3783.29  | 6812.6 | 1                                                     | 1055.8 | 29.7 | 4 TLFQNR.L                                                 |
| *               | 302.2794.2794.2 | 3.8237 | 0.4952 | 1469.29 | 1469.634 | 8797.8 | 1                                                     | 2419.4 | 90.9 | 8 R.LTEFETWLTNSK.F                                         |
| *               | 303.1676.1676.2 | 3.0971 | 0.3999 | 1152    | 1152.298 | 5677.1 | 1                                                     | 1026.7 | 87.5 | 2 K.WVQHPETR.N                                             |
| *               | 307.2821.2821.2 | 3.4108 | 0.4999 | 1937.11 | 1937.072 | 9172.7 | 1                                                     | 1109   | 56.7 | 3 R.NVWDADYYQITFADSK.I                                     |
| *               | 205.2844.2844.2 | 2.7815 | 0.1529 | 1100.38 | 1100.303 | 3902.4 | 1                                                     | 592.5  | 81.2 | 2 K.IPLPFDEL.R.L                                           |
| *               | 303.2322.2322.2 | 4.02   | 0.3899 | 1883.25 | 1884.098 | 8337.9 | 1                                                     | 1470   | 66.7 | 2 R.VWDENYSVLGQYGKPK.D<br>K.DINEVINNDNIIYVLGQNFSGYAAGT     |
| *               | 307.3126.3126.2 | 5.8973 | 0.5875 | 3042.34 | 3043.32  | 7035.4 | 1                                                     | 837.5  | 40.7 | 8 AR.R<br>K.DINEVINNDNIIYVLGQNFSGYAAGT                     |
| *               | 304.4066.4066.3 | 5.2635 | 0.3697 | 3044.25 | 3043.32  | 11774  | 1                                                     | 2141.4 | 34.3 | 4 AR.R                                                     |
| *               | 307.0402.0402.2 | 5.0764 | 0.4752 | 2219.73 | 2218.514 | 9602.5 | 1                                                     | 1322.8 | 55.3 | 5 R.RVLLLEGYLGNYAGTLTYSIN.-                                |
| gj 55980830 ref | 11              | 55     | 38.30% | 256     | 29277    | 5.6 U  | 30S ribosomal protein S2 [Thermus thermophilus HB8]   |        |      |                                                            |
| *               | 302.3358.3358.2 | 3.9305 | 0.4008 | 1494.72 | 1494.65  | 8959   | 1                                                     | 1380.7 | 75   | 7 K.ELLEAGVHFGHER.K                                        |
| *               | 302.2972.2972.2 | 2.7293 | 0.2655 | 1167.12 | 1167.411 | 3809.9 | 1                                                     | 540.4  | 83.3 | 1 R.WLGGMLTNFK.T                                           |
| *               | 305.4374.4374.3 | 6.2161 | 0.4654 | 2493.43 | 2493.822 | 6537.4 | 1                                                     | 2751.4 | 52.5 | 14 R.VHRLEELEALFASPEIEERPK.K                               |
| *               | 304.2900.2902.2 | 5.4002 | 0.4498 | 2494.17 | 2493.822 | 6974.6 | 1                                                     | 878.1  | 55   | 12 R.VHRLEELEALFASPEIEERPK.K                               |
| *               | 307.2898.2898.2 | 3.3544 | 0.4156 | 2621.2  | 2621.996 | 9809   | 1                                                     | 393.5  | 38.1 | 1 R.VHRLEELEALFASPEIEERPKK.E                               |
| *               | 307.2730.2730.3 | 5.6968 | 0.4551 | 2621.57 | 2621.996 | 8182.2 | 1                                                     | 1933.1 | 41.7 | 9 R.VHRLEELEALFASPEIEERPKK.E                               |
| *               | 303.2927.2927.3 | 4.7461 | 0.3208 | 2101.84 | 2101.361 | 4400.3 | 1                                                     | 1150.3 | 47.1 | 2 R.LEELEALFASPEIEERPK.K                                   |
| *               | 303.2931.2934.2 | 5.3108 | 0.4278 | 2101.99 | 2101.361 | 6360.3 | 1                                                     | 1499.1 | 70.6 | 1 R.LEELEALFASPEIEERPK.K                                   |
| *               | 302.0155.0155.2 | 4.0712 | 0.4256 | 1472.12 | 1471.74  | 3698.5 | 1                                                     | 873.5  | 83.3 | 3 K.RLPDAIFVVDPTK.E<br>R.KLFIPVIALADTDSDPDLVDYIIPGND       |
| *               | 304.4633.4633.3 | 4.07   | 0.2533 | 3387.52 | 3386.824 | 4207.5 | 6                                                     | 228.6  | 20   | 3 DAIR.S                                                   |
| *               | 303.2454.2454.2 | 3.4493 | 0.2198 | 998.76  | 999.199  | 5973.2 | 3                                                     | 1276.2 | 87.5 | 2 R.AVDLIQAR.G                                             |
| gj 55981366 ref | 7               | 18     | 37.70% | 106     | 11703    | 11.9 U | 30S ribosomal protein S20 [Thermus thermophilus HB8]  |        |      |                                                            |
| *               | 103.1522.1522.1 | 2.6228 | 0.1455 | 957.52  | 958.103  | 7501.7 | 3                                                     | 693.4  | 68.8 | 1 K.AIQLAQEGK.A                                            |
| *               | 103.1515.1515.2 | 2.6447 | 0.1191 | 958.37  | 958.103  | 6135.9 | 2                                                     | 1136.2 | 81.2 | 1 K.AIQLAQEGK.A                                            |
| *               | 106.2424.2424.2 | 5.1741 | 0.364  | 1600.4  | 1599.825 | 9142.4 | 1                                                     | 2492   | 82.1 | 7 K.AIQLAQEGKAEELK.I                                       |
| *               | 104.1318.1318.2 | 3.2524 | 0.1602 | 904.22  | 904.051  | 4980.2 | 9                                                     | 650.9  | 85.7 | 3 R.KAESLIDK.A                                             |
| *               | 102.2354.2354.1 | 2.1593 | 0.1543 | 775.61  | 775.877  | 5090.7 | 2                                                     | 507.5  | 75   | 1 K.AESLIDK.A                                              |
| *               | 102.2538.2538.1 | 3.3541 | 0.3775 | 1537.58 | 1538.784 | 8062.4 | 1                                                     | 684.2  | 50   | 2 R.QLLEAAGAPLIGGGLSA.-                                    |
| *               | 102.2539.2541.2 | 5.1912 | 0.5804 | 1537.84 | 1538.784 | 6703.8 | 1                                                     | 1640.5 | 71.9 | 3 R.QLLEAAGAPLIGGGLSA.-                                    |

| gi 55981634 ref | 9               | 20     | 37.30% | 209     | 24324    | 10.5 U | 30S ribosomal protein S4 [Thermus thermophilus HB8]   |        |      |   |                             |
|-----------------|-----------------|--------|--------|---------|----------|--------|-------------------------------------------------------|--------|------|---|-----------------------------|
| *               | 304.1519.1519.2 | 3.372  | 0.3042 | 964.02  | 964.069  | 4551.6 | 1                                                     | 918.9  | 100  | 3 | R.RPSDYAVR.L                |
| *               | 104.1805.1805.1 | 1.8223 | 0.1284 | 837.63  | 837.951  | 3817.4 | 2                                                     | 290.3  | 83.3 | 1 | R.IYGISER.Q                 |
| *               | 103.1873.1873.1 | 2.6196 | 0.287  | 937.37  | 938.025  | 4284.1 | 1                                                     | 303.6  | 71.4 | 7 | R.NLFEEASK.K                |
| *               | 303.3578.3578.2 | 3.1742 | 0.351  | 1434.06 | 1435.663 | 10015  | 1                                                     | 1393.3 | 65.4 | 1 | K.GVTGSVFLGLLES.R.L         |
| *               | 103.1658.1659.2 | 2.6295 | 0.1499 | 880.67  | 879.004  | 7876.7 | 4                                                     | 1205   | 91.7 | 2 | R.LDNVVYR.L                 |
| *               | 303.1816.1816.2 | 2.6559 | 0.2478 | 1005.62 | 1006.15  | 5785.3 | 1                                                     | 665.1  | 85.7 | 1 | R.RVDLPSYR.V                |
| *               | 204.2164.2164.2 | 2.7146 | 0.158  | 1284.57 | 1284.455 | 7927   | 1                                                     | 951.1  | 68.2 | 1 | R.VRPGDEIAVAEK.S            |
| *               | 305.3048.3048.2 | 3.9381 | 0.4821 | 1559.71 | 1559.864 | 7464.6 | 1                                                     | 1649.3 | 73.1 | 1 | R.KVGPWLSLDVEGMK.G          |
| *               | 207.2780.2780.2 | 3.1239 | 0.2719 | 1431.39 | 1431.69  | 5416.6 | 1                                                     | 869.8  | 70.8 | 3 | K.VGPWLSLDVEGMK.G           |
| gi 5000000078   | 41              | 117    | 33.90% | 1524    | 172123   | 8.6 U  | Translation: 75309..79883 (reverse), 1525 amino acids |        |      |   |                             |
| *               | 205.2976.2976.2 | 3.5537 | 0.2263 | 1119.37 | 1119.306 | 7666.3 | 1                                                     | 1518.7 | 93.8 | 2 | K.FALEQILER.E               |
| *               | 203.1854.1854.2 | 3.874  | 0.4324 | 1301.22 | 1301.398 | 5807.2 | 1                                                     | 1171.4 | 85   | 2 | K.SINYSQFANEK.G             |
| *               | 203.2019.2019.2 | 4.3076 | 0.4329 | 1524.33 | 1524.673 | 7391.3 | 1                                                     | 1737.3 | 80.8 | 6 | K.VPAGYIAYNVEDGR.V          |
| *               | 204.3111.3111.2 | 3.9204 | 0.3506 | 1373.6  | 1373.546 | 8205.6 | 1                                                     | 1609.7 | 79.2 | 4 | K.EDVAGLIEASLQK.N           |
| *               | 203.2078.2078.2 | 4.3005 | 0.4205 | 1289.47 | 1289.385 | 6779.3 | 1                                                     | 1553.2 | 86.4 | 2 | K.DLLQAVDSDANK.Y            |
| *               | 203.2342.2342.2 | 3.1343 | 0.4591 | 1745.71 | 1746.871 | 8481.1 | 1                                                     | 921.6  | 57.7 | 1 | K.NNLDYVVYVDPENK.Y          |
| *               | 207.2600.2600.2 | 3.7266 | 0.462  | 1388.41 | 1388.604 | 5993.6 | 1                                                     | 842.8  | 77.3 | 7 | K.YLTNLSTYLATK.D            |
| *               | 203.2722.2722.2 | 2.6223 | 0.2205 | 1212.27 | 1212.388 | 4916   | 1                                                     | 667.2  | 77.8 | 2 | K.EVFFSDNLLK.L              |
| *               | 203.2230.2230.2 | 3.8357 | 0.42   | 1495.29 | 1495.629 | 5653.6 | 1                                                     | 529.2  | 57.7 | 2 | R.SQGASNEALFTELK.R          |
| *               | 207.2900.2900.2 | 4.8137 | 0.3533 | 1582.59 | 1582.838 | 9620.3 | 1                                                     | 1667.9 | 69.2 | 4 | R.ALDNLLTEIIQNPK.L          |
| *               | 206.2725.2725.1 | 2.1881 | 0.241  | 844.52  | 845.073  | 3496.3 | 2                                                     | 457.4  | 71.4 | 2 | K.IFGLPIGK.Q                |
| *               | 206.2730.2730.2 | 2.5863 | 0.1424 | 845.3   | 845.073  | 2091.3 | 6                                                     | 490.8  | 92.9 | 1 | K.IFGLPIGK.Q                |
| *               | 304.4366.4366.2 | 5.0454 | 0.4304 | 1990.75 | 1992.279 | 9084.7 | 1                                                     | 1833.6 | 70   | 6 | K.FKEELDDLWLLNIQK.D         |
| *               | 304.4357.4357.3 | 4.4413 | 0.273  | 1993.48 | 1992.279 | 8198.1 | 1                                                     | 1636.4 | 45   | 4 | K.FKEELDDLWLLNIQK.D         |
| *               | 306.3274.3274.2 | 4.0948 | 0.3193 | 1516.87 | 1517.974 | 5773   | 1                                                     | 1215.2 | 81.8 | 2 | K.FPLMWMPLLLQK.F            |
| *               | 306.3273.3273.1 | 2.9086 | 0.2067 | 1517.36 | 1517.974 | 8147.8 | 1                                                     | 805.6  | 59.1 | 1 | K.FPLMWMPLLLQK.F            |
| *               | 206.2491.2491.2 | 2.7179 | 0.2605 | 1096.13 | 1096.271 | 3958.1 | 1                                                     | 724.9  | 83.3 | 1 | K.FGIIGYNSPK.L              |
| *               | 207.2700.2700.2 | 3.6449 | 0.3997 | 1501.28 | 1501.809 | 2686.7 | 1                                                     | 597.9  | 70.8 | 2 | K.ISLQPYQVQALLK.F           |
| *               | 306.2598.2598.2 | 3.5533 | 0.4249 | 1302.03 | 1302.577 | 5638.6 | 1                                                     | 1595.8 | 87.5 | 2 | K.VGMFIAHATGLGK.T           |
| *               | 307.3507.3507.2 | 4.6209 | 0.5915 | 2496.83 | 2497.856 | 8069.2 | 1                                                     | 1435.2 | 54.5 | 3 | K.TFTGLLAYALATNLGLHTVSYNR.D |
| *               | 302.4273.4273.2 | 4.5654 | 0.5022 | 1539.72 | 1538.7   | 7763.4 | 1                                                     | 2240.7 | 87.5 | 6 | K.GWIDDAETLFGWK.V           |
| *               | 203.2254.2254.2 | 4.3275 | 0.4264 | 1715.63 | 1714.919 | 7371.3 | 1                                                     | 1746.6 | 71.4 | 4 | K.VGQEIVIEGNPQQR.R          |
| *               | 303.3219.3219.2 | 3.6807 | 0.3796 | 1289.26 | 1288.492 | 7584.6 | 1                                                     | 1558.7 | 88.9 | 1 | K.WSQLLDLWAR.A              |
| *               | 306.2937.2937.2 | 4.12   | 0.4169 | 1688.4  | 1689.995 | 6482.6 | 1                                                     | 780.1  | 60.7 | 2 | K.YFLNLLSGPSIISHK.G         |
| *               | 305.4110.4110.2 | 4.2911 | 0.5019 | 2050.89 | 2052.37  | 7215.1 | 1                                                     | 1023.7 | 59.4 | 4 | K.DFSSAMEMLFYQGHLFK.R       |
| *               | 204.2187.2187.2 | 3.7628 | 0.4796 | 1414.79 | 1415.645 | 7345.3 | 1                                                     | 1470.5 | 79.2 | 2 | K.TPSGPIINEDMLK.T           |
| *               | 305.3531.3531.2 | 3.807  | 0.4298 | 2875.5  | 2876.146 | 10460  | 1                                                     | 983.9  | 39.6 | 3 | N                           |
| *               | 303.3282.3282.3 | 4.5929 | 0.4538 | 2878.02 | 2876.146 | 6243.4 | 1                                                     | 547.5  | 26   | 1 | N                           |
| *               | 206.2797.2797.2 | 3.5785 | 0.3729 | 1716.59 | 1716.929 | 5724.5 | 1                                                     | 1063.9 | 66.7 | 3 | R.SLVDTLSSVSPNILDR.F        |
| *               | 306.2658.2658.2 | 3.2889 | 0.357  | 1252.38 | 1252.461 | 6468.1 | 1                                                     | 807.2  | 72.2 | 4 | K.IRFPGYAWNK.K              |



|                 |                 |        |        |         |          |        |                                                                 |        |      |    |                                                       |
|-----------------|-----------------|--------|--------|---------|----------|--------|-----------------------------------------------------------------|--------|------|----|-------------------------------------------------------|
| *               | 203.1928.1928.2 | 3.1743 | 0.3147 | 1060.39 | 1060.195 | 6841.7 | 1                                                               | 1211.5 | 88.9 | 1  | R.TGVSGLLEQR.K                                        |
| *               | 304.2463.2463.2 | 4.2414 | 0.5347 | 1938.8  | 1938.15  | 4542.5 | 1                                                               | 1107.1 | 80   | 4  | K.HLYYPVIENTAQGEFR.I                                  |
| *               | 302.2763.2766.2 | 3.8105 | 0.315  | 2023.88 | 2022.222 | 9153.1 | 2                                                               | 509.7  | 44.1 | 3  | K.AAPFLNEDGTLNENFQIK.Q                                |
| *               | 203.1926.1926.2 | 3.7019 | 0.3915 | 1444.96 | 1444.584 | 5941.9 | 1                                                               | 900.8  | 70.8 | 4  | K.ASYNAIATTEQFK.R                                     |
| *               | 305.2324.2324.2 | 3.8602 | 0.4677 | 1664.07 | 1662.927 | 5610.7 | 1                                                               | 881.7  | 67.9 | 1  | K.RVVEEALKPFATSSK.T                                   |
| *               | 205.2268.2268.2 | 3.0852 | 0.2251 | 1277.3  | 1277.547 | 6337.8 | 1                                                               | 1245.7 | 81.8 | 3  | K.ILITSPSTAFVK.S                                      |
| *               | 204.2682.2682.2 | 3.7664 | 0.3448 | 1242.14 | 1242.374 | 5788.9 | 1                                                               | 977.6  | 83.3 | 4  | K.SLDYVFDNIR.K                                        |
| *               | 305.1979.1979.2 | 2.7091 | 0.4497 | 1994.81 | 1994.258 | 7550.4 | 1                                                               | 440.3  | 44.1 | 1  | K.IIESHNANNKPSITVLSR.A                                |
| *               | 307.3207.3209.2 | 5.9154 | 0.6136 | 2135.05 | 2136.517 | 7487.2 | 1                                                               | 1433.4 | 63.9 | 3  | K.IVVHGATFSYETILQMLGR.A                               |
| *               | 304.4259.4259.2 | 3.6317 | 0.2531 | 1994.88 | 1996.398 | 4361.3 | 1                                                               | 508.5  | 47.4 | 2  | K.GKVDASIILPQSVASVGLK.S                               |
| *               | 205.2536.2536.2 | 3.6846 | 0.3841 | 1369.45 | 1369.645 | 6485.8 | 1                                                               | 895    | 70.8 | 5  | K.VVDALSNIITPVK.I                                     |
| gj 55981862 ref | 17              | 54     | 33.00% | 928     | 98037    | 4.8 U  | S-layer protein precursor (P100 protein) [Thermus thermophilus] |        |      |    |                                                       |
| *               | 306.0515.0515.3 | 3.7243 | 0.3169 | 3250.98 | 3252.606 | 12984  | 1                                                               | 1088.2 | 24.1 | 1  | R.SQVEANADAIQALNELAVLLNQDVL<br>1 SLQDR.V              |
| *               | 305.4188.4190.2 | 3.0931 | 0.359  | 2740.46 | 2741.925 | 7532.8 | 1                                                               | 354.4  | 30   | 2  | R.YSISGSLSATYGTVVTDGTNFDID<br>2 R.L                   |
| *               | 302.2110.2110.2 | 2.869  | 0.3502 | 1501.67 | 1499.623 | 8058.8 | 1                                                               | 605.2  | 57.7 | 1  | K.GNVDGQAFSVVYSR.A                                    |
| *               | 303.2902.2902.3 | 4.1552 | 0.4219 | 1940.62 | 1940.247 | 4561.6 | 1                                                               | 1851.6 | 51.3 | 2  | K.FPLAPEVTVVAGVAGPDATK.D                              |
| *               | 303.2876.2876.2 | 5.5183 | 0.5368 | 1941.4  | 1940.247 | 5933   | 1                                                               | 2376.2 | 78.9 | 2  | K.FPLAPEVTVVAGVAGPDATK.D                              |
| *               | 306.3075.3077.3 | 4.7182 | 0.4388 | 2347.93 | 2349.695 | 9879.4 | 1                                                               | 2190.3 | 40.5 | 1  | R.TAVKPFALNLLALNYATNLGNR.S                            |
| *               | 306.3081.3082.2 | 5.9022 | 0.5748 | 2349.52 | 2349.695 | 5749.2 | 1                                                               | 1405.8 | 61.9 | 5  | R.TAVKPFALNLLALNYATNLGNR.S                            |
| *               | 304.3831.3833.2 | 5.0879 | 0.5501 | 1948.88 | 1950.205 | 7115.8 | 1                                                               | 1726.3 | 70.6 | 6  | K.PFSALNLLALNYATNLGNR.S                               |
| *               | 304.3866.3866.3 | 5.2916 | 0.3534 | 1949.67 | 1950.205 | 8588.1 | 1                                                               | 2874   | 52.9 | 5  | K.PFSALNLLALNYATNLGNR.S<br>K.LSGLWVSSQTPGSPFADFFDNTLS |
| *               | 306.0180.0180.3 | 6.1202 | 0.5698 | 3871.08 | 3872.195 | 5374.5 | 1                                                               | 910.5  | 27.9 | 2  | DWAYYAQAEAK.L<br>K.LGPLSLSANYHAVDPQYADGQAGM           |
| *               | 303.2550.2550.3 | 6.1242 | 0.5204 | 3949.67 | 3951.18  | 8373.8 | 1                                                               | 933.1  | 25   | 3  | SENETTTYGGGEK.A                                       |
| *               | 304.3899.3899.2 | 4.0623 | 0.4853 | 1490.29 | 1489.755 | 7036.5 | 1                                                               | 1042   | 63.3 | 6  | R.GLGVASVGFPGVTLK.G<br>K.GYAESEGDYNLAPGSVNDAGWVA      |
| *               | 302.3651.3651.2 | 3.0966 | 0.3427 | 3074.55 | 3076.262 | 4653.1 | 1                                                               | 225.8  | 27.6 | 2  | ATLGSFR.G                                             |
| *               | 305.4252.4254.2 | 4.7599 | 0.5425 | 2353.8  | 2352.649 | 10404  | 1                                                               | 951.8  | 45.5 | 12 | K.GGVQVSTDPLLFLSLDGAVSYR.R                            |
| *               | 305.2471.2471.2 | 3.5471 | 0.3994 | 2383.73 | 2384.567 | 6012.7 | 1                                                               | 269.3  | 41.7 | 2  | R.RTQYTNPNPSNVTTYELYR.A                               |
| *               | 303.2180.2180.2 | 3.0615 | 0.4004 | 2229.75 | 2228.379 | 9177.2 | 1                                                               | 530.5  | 44.1 | 1  | R.TQYTNPNPSNVTTYELYR.A<br>K.LNFVAYAHYEGDQLAGTGLPVVG   |
| *               | 305.3463.3463.3 | 3.6767 | 0.3391 | 3570.67 | 3572.918 | 8404.5 | 1                                                               | 618.9  | 24.2 | 1  | SGNQAFNFAR.D                                          |
| gj 55981652 ref | 8               | 19     | 32.40% | 105     | 12298    | 10.3 U | 30S ribosomal protein S17 [Thermus thermophilus HB8]            |        |      |    |                                                       |
| *               | 103.1817.1817.1 | 2.9417 | 0.3721 | 1016.53 | 1017.211 | 8722   | 1                                                               | 685.3  | 66.7 | 2  | K.VLTGVVVSDK.M                                        |
| *               | 203.1702.1702.1 | 2.6854 | 0.4111 | 1016.62 | 1017.211 | 10025  | 1                                                               | 825.1  | 66.7 | 2  | K.VLTGVVVSDK.M                                        |
| *               | 103.1822.1822.2 | 3.0856 | 0.3858 | 1016.97 | 1017.211 | 3866.7 | 1                                                               | 744.1  | 88.9 | 1  | K.VLTGVVVSDK.M                                        |
| *               | 203.1708.1708.2 | 2.8255 | 0.374  | 1017.41 | 1017.211 | 4548.1 | 1                                                               | 724.3  | 83.3 | 2  | K.VLTGVVVSDK.M                                        |
| *               | 103.1117.1117.2 | 2.7477 | 0.1276 | 1102.36 | 1102.189 | 6418.9 | 1                                                               | 1034.5 | 81.2 | 2  | K.YLAHDPEEK.Y                                         |
| *               | 106.2715.2715.1 | 2.6807 | 0.2722 | 1229.56 | 1230.404 | 4547.7 | 1                                                               | 414.4  | 60   | 2  | K.LGDVVEIIESR.P                                       |

|                 |                 |        |        |         |          |        |                                                                     |        |      |    |                            |
|-----------------|-----------------|--------|--------|---------|----------|--------|---------------------------------------------------------------------|--------|------|----|----------------------------|
| *               | 106.2709.2709.2 | 3.9154 | 0.2987 | 1230.47 | 1230.404 | 7083.6 | 1                                                                   | 1314.4 | 80   | 5  | K.LGDVVEIIESR.P            |
| *               | 206.2975.2977.2 | 3.8104 | 0.4492 | 1655.65 | 1655.932 | 9022.7 | 1                                                                   | 1163.2 | 64.3 | 3  | K.LGDVVEIIESRPISK.R        |
| gj 5000000167   | 19              | 154    | 31.90% | 361     | 40658    | 6 U    | Translation: 150256..151341 (direct), 362 amino acids               |        |      |    |                            |
| *               | 301.0144.0144.1 | 1.9917 | 0.1798 | 1032.53 | 1033.167 | 8037.7 | 4                                                                   | 503.8  | 61.1 | 1  | K.SVVDVTVEGK.V             |
| *               | 302.1936.1936.2 | 3.0842 | 0.3474 | 1033.45 | 1033.167 | 3697.6 | 1                                                                   | 795.6  | 88.9 | 2  | K.SVVDVTVEGK.V             |
| *               | 307.2969.2969.2 | 3.8176 | 0.4752 | 2449.28 | 2450.662 | 10273  | 1                                                                   | 672.3  | 38.6 | 12 | K.SSGESGQTGSLKEEIREEVVTK.S |
| *               | 303.3252.3252.3 | 4.4911 | 0.4897 | 2450.36 | 2450.662 | 7232.6 | 1                                                                   | 1021.4 | 35.2 | 17 | K.SSGESGQTGSLKEEIREEVVTK.S |
| *               | 302.3280.3280.1 | 2.5399 | 0.2162 | 1330.56 | 1331.509 | 4208.8 | 1                                                                   | 411.7  | 65   | 4  | K.EEIREEVVTK.S             |
| *               | 302.2756.2758.2 | 3.7631 | 0.3369 | 1330.96 | 1331.509 | 6211.7 | 1                                                                   | 958.5  | 80   | 59 | K.EEIREEVVTK.S             |
| *               | 302.2976.2976.2 | 6.7541 | 0.6181 | 2187.19 | 2188.309 | 5082.8 | 1                                                                   | 1526   | 72.2 | 2  | K.HSVEEDDSNVPFLDDVIEK.L    |
| *               | 105.1726.1726.2 | 2.7218 | 0.1908 | 828.35  | 828.002  | 5310.6 | 1                                                                   | 1227.7 | 92.9 | 4  | R.AALVNALR.V               |
| *               | 203.1915.1915.2 | 3.2666 | 0.3169 | 1139.22 | 1139.309 | 3754.8 | 1                                                                   | 653    | 87.5 | 1  | R.VIEEFMQDK.L              |
| *               | 302.3270.3270.2 | 6.6594 | 0.6074 | 2126.44 | 2126.297 | 5730.8 | 1                                                                   | 1976.2 | 73.7 | 11 | K.TNLSTAISDVMALSEESNK.S    |
| *               | 205.3584.3585.2 | 2.8251 | 0.4969 | 2126.68 | 2126.297 | 6261.4 | 1                                                                   | 555.2  | 50   | 2  | K.TNLSTAISDVMALSEESNK.S    |
| *               | 205.3518.3520.3 | 3.5137 | 0.428  | 2126.68 | 2126.297 | 12208  | 1                                                                   | 1360.5 | 35.5 | 1  | K.TNLSTAISDVMALSEESNK.S    |
| *               | 303.3180.3180.3 | 5.6885 | 0.4704 | 2127.7  | 2126.297 | 6661.2 | 1                                                                   | 1486.5 | 43.4 | 7  | K.TNLSTAISDVMALSEESNK.S    |
| *               | 302.2119.2120.1 | 2.571  | 0.172  | 1433.27 | 1433.599 | 9487.5 | 1                                                                   | 948.8  | 61.5 | 7  | K.ALEATSATVEALEK.E         |
| *               | 203.2054.2054.2 | 4.4136 | 0.5333 | 1433.69 | 1433.599 | 7782.6 | 1                                                                   | 1813.1 | 80.8 | 4  | K.ALEATSATVEALEK.E         |
| *               | 302.2112.2114.2 | 4.3849 | 0.4926 | 1435.03 | 1433.599 | 7541.4 | 1                                                                   | 1449.4 | 76.9 | 8  | K.ALEATSATVEALEK.E         |
| *               | 305.2892.2894.2 | 5.275  | 0.4172 | 2758.86 | 2760.065 | 10940  | 1                                                                   | 1172.4 | 40   | 10 | K.S                        |
| *               | 307.2709.2709.3 | 4.5666 | 0.4239 | 2760.89 | 2760.065 | 5426.8 | 1                                                                   | 1574.2 | 39   | 1  | K.S                        |
| *               | 301.0108.0108.1 | 2.2111 | 0.16   | 1345.86 | 1345.489 | 4946.6 | 2                                                                   | 259.7  | 50   | 1  | K.EDLESEVVPVTK.S           |
| gj 55981400 ref | 1               | 2      | 31.90% | 69      | 7748     | 6.1 U  | hypothetical protein TTHA1431 [Thermus thermophilus HB8]            |        |      |    |                            |
| *               | 307.3133.3133.2 | 2.576  | 0.247  | 2259.24 | 2256.561 | 9118.2 | 1                                                                   | 383.8  | 35.7 | 2  | K.KVELVGTSEEGLEAAIQAALAR.A |
| gj 55979971 ref | 7               | 30     | 31.80% | 422     | 45501    | 5.1 U  | enolase (2-phosphoglycerate dehydratase) [Thermus thermophilus HB8] |        |      |    |                            |
| *               | 302.3873.3873.2 | 3.8099 | 0.2915 | 2228.48 | 2227.67  | 7041.4 | 1                                                                   | 696.2  | 45.2 | 1  | R.YLGGVQGVTLPLVMNVINGGK.H  |
| *               | 303.3981.3981.2 | 3.4622 | 0.3729 | 2256.21 | 2256.581 | 3452.6 | 1                                                                   | 410.3  | 50   | 3  | R.VDFQEFMLVPAGAGSFAEALR.I  |
| *               | 302.1998.1998.2 | 4.0209 | 0.4764 | 1755.16 | 1755.838 | 6128.6 | 1                                                                   | 1100.4 | 65.6 | 2  | K.GYSTNVGDEGGFAPDLR.S      |
| *               | 106.2841.2841.2 | 4.6707 | 0.562  | 2337.97 | 2339.564 | 6917   | 1                                                                   | 811.7  | 47.6 | 5  | R.AGYTPGQEVSLALDPATSELYR.D |
| *               | 106.2759.2759.2 | 4.5382 | 0.556  | 1701.84 | 1702.905 | 8358.2 | 1                                                                   | 2317.7 | 78.6 | 5  | K.VQLVGDDLFTNPER.L         |
| *               | 303.2868.2868.2 | 3.7238 | 0.5095 | 1643.97 | 1644.866 | 7692.7 | 1                                                                   | 1083.6 | 67.9 | 1  | K.VNQIGTLSETLEAIR.L        |
| *               | 304.4335.4337.2 | 4.9603 | 0.4995 | 2236.91 | 2236.441 | 9959.7 | 1                                                                   | 1485.1 | 52.4 | 13 | R.SGETEDSFIADLAVAVNAGQIK.T |
| gj 55981650 ref | 4               | 13     | 30.90% | 110     | 12057    | 10.1 U | 50S ribosomal protein L24 [Thermus thermophilus HB8]                |        |      |    |                            |
| *               | 107.2527.2527.2 | 4.5733 | 0.2943 | 1304.48 | 1304.572 | 6836.7 | 1                                                                   | 1983.3 | 90.9 | 2  | K.YAVIVEGVNIVK.K           |
| *               | 103.1857.1857.2 | 2.8053 | 0.2199 | 1038.88 | 1039.176 | 6015.5 | 1                                                                   | 1359.3 | 93.8 | 2  | K.YPQGGFIEK.E              |
| *               | 307.2297.2297.2 | 3.4591 | 0.2838 | 1512.23 | 1512.728 | 4994.9 | 1                                                                   | 619.4  | 70.8 | 6  | K.VRPICPACGKPTR.V          |
| *               | 306.2285.2285.3 | 4.0254 | 0.3954 | 1512.91 | 1512.728 | 6736.1 | 2                                                                   | 993.5  | 45.8 | 3  | K.VRPICPACGKPTR.V          |
| gj 55981665 ref | 4               | 7      | 30.10% | 156     | 18016    | 10.4 U | 30S ribosomal protein S7 [Thermus thermophilus HB8]                 |        |      |    |                            |
| *               | 304.4369.4369.2 | 3.4006 | 0.4923 | 2136.37 | 2134.48  | 8680.9 | 1                                                                   | 778.7  | 47.2 | 1  | R.QLQPDLVYGDVLVTAFAINK.I   |

|                 |                 |        |        |         |          |        |                                                                |        |      |   |                            |
|-----------------|-----------------|--------|--------|---------|----------|--------|----------------------------------------------------------------|--------|------|---|----------------------------|
| *               | 305.1932.1932.2 | 4.1247 | 0.3728 | 1760.37 | 1761.009 | 5286   | 1                                                              | 970.2  | 70   | 1 | R.RVGGANYQVPMEVSPR.R       |
| *               | 204.1950.1950.2 | 3.5823 | 0.2916 | 1605.65 | 1604.821 | 4273.9 | 1                                                              | 474.7  | 57.1 | 2 | R.VGGANYQVPMEVSPR.R        |
| *               | 305.1839.1839.2 | 3.1514 | 0.3187 | 1468.26 | 1468.658 | 8452.6 | 1                                                              | 1216.1 | 77.3 | 3 | R.WLVQAAANQRPER.R          |
| gj 5000000052   | 4               | 8      | 29.70% | 175     | 21205    | 5.5 U  | Translation: 43411..43938 (direct), 176 amino acids            |        |      |   |                            |
| *               | 304.3354.3354.2 | 4.794  | 0.4328 | 1593.08 | 1593.819 | 6490.3 | 1                                                              | 1609.6 | 83.3 | 3 | K.IYFVNDFEGIFTK.E          |
| *               | 304.3143.3143.2 | 3.6547 | 0.4406 | 1787.74 | 1787.065 | 4312.2 | 1                                                              | 783.2  | 71.4 | 2 | R.VAYELSPTEYFVVLN.N        |
| *               | 206.2554.2554.1 | 2.0353 | 0.1489 | 840.62  | 840.053  | 5796.2 | 4                                                              | 554.9  | 75   | 1 | K.FLGVLYK.N                |
| *               | 304.4242.4242.2 | 3.1224 | 0.4145 | 1977.56 | 1978.311 | 6787   | 1                                                              | 617.3  | 53.1 | 2 | K.NNLPLSLVDYIMLETNK.R      |
| gj 55981433 ref | 3               | 3      | 29.70% | 128     | 14383    | 10.4 U | 30S ribosomal protein S9 [Thermus thermophilus HB8]            |        |      |   |                            |
| *               | 303.2947.2947.2 | 2.5094 | 0.2926 | 1986.42 | 1987.179 | 9223.7 | 1                                                              | 428.8  | 40.6 | 1 | K.VTVNGQDFNEYFQGLVR.A      |
| *               | 103.1931.1931.2 | 3.2527 | 0.3815 | 1239.08 | 1239.373 | 5946.2 | 1                                                              | 1208.3 | 88.9 | 1 | R.ALVQYNPDYR.A             |
| *               | 306.2793.2793.2 | 2.6481 | 0.1546 | 1245.15 | 1244.566 | 3842.6 | 1                                                              | 622    | 80   | 1 | R.AKCLKPLGFLTR.D           |
| gj 55981655 ref | 8               | 26     | 29.30% | 239     | 26701    | 10.7 U | 30S ribosomal protein S3 [Thermus thermophilus HB8]            |        |      |   |                            |
| *               | 306.2706.2706.2 | 4.5335 | 0.4675 | 1973.41 | 1974.314 | 7295.2 | 1                                                              | 1307.5 | 57.9 | 7 | R.AADNVAVTVHVAKPGVVIGR.G   |
| *               | 306.2730.2730.3 | 4.164  | 0.4253 | 1973.54 | 1974.314 | 4942.8 | 1                                                              | 986.3  | 43.4 | 2 | R.AADNVAVTVHVAKPGVVIGR.G   |
| *               | 303.2392.2392.3 | 5.7614 | 0.4464 | 2373.87 | 2375.69  | 8952.4 | 1                                                              | 1840.5 | 41.7 | 3 | K.NVALNVQEVQNPNSAPLVAQR.V  |
| *               | 303.2387.2387.2 | 5.7467 | 0.5351 | 2373.92 | 2375.69  | 6824.9 | 1                                                              | 1174.3 | 54.8 | 2 | K.NVALNVQEVQNPNSAPLVAQR.V  |
| *               | 206.2570.2570.3 | 4.906  | 0.474  | 2375.3  | 2375.69  | 10462  | 3                                                              | 1052.8 | 31   | 1 | K.NVALNVQEVQNPNSAPLVAQR.V  |
| *               | 106.2680.2680.2 | 5.8698 | 0.5225 | 2375.41 | 2375.69  | 7040.1 | 1                                                              | 1238.5 | 57.1 | 2 | K.NVALNVQEVQNPNSAPLVAQR.V  |
| *               | 306.2819.2819.2 | 4.976  | 0.502  | 1620.26 | 1620.932 | 5927.6 | 1                                                              | 1704.8 | 82.1 | 8 | K.AYIFLGEVIGGQKPK.A        |
| *               | 306.2315.2315.2 | 3.3492 | 0.227  | 1550.28 | 1549.773 | 4111.6 | 2                                                              | 349.7  | 62.5 | 1 | K.ARPELPKAEERPR.R          |
| gj 55980200 ref | 1               | 2      | 25.40% | 67      | 7730     | 4.5 U  | 2-oxoisovalerate dehydrogenase, E1 component beta subunit [T   |        |      |   |                            |
| *               | 103.2222.2222.2 | 2.8136 | 0.1441 | 1922.82 | 1924.114 | 5266.5 | 1                                                              | 544.4  | 50   | 2 | R.ALGEAIFTEGETWEELK.E      |
| gj 55980212 ref | 3               | 4      | 25.00% | 88      | 10231    | 11.5 U | 30S ribosomal protein S18 [Thermus thermophilus HB8]           |        |      |   |                            |
| *               | 306.2635.2635.2 | 3.2261 | 0.3658 | 1417.24 | 1417.695 | 4216.3 | 1                                                              | 528.9  | 72.7 | 1 | K.RFLSETGKILPR.R           |
| *               | 206.2819.2819.1 | 2.3405 | 0.3215 | 1130.46 | 1131.401 | 4643.5 | 2                                                              | 409.8  | 66.7 | 1 | R.ILGLLPFTEK.L             |
| *               | 207.2786.2788.2 | 3.078  | 0.1821 | 1131.48 | 1131.401 | 3781.7 | 2                                                              | 708.3  | 83.3 | 2 | R.ILGLLPFTEK.L             |
| gj 55980315 ref | 3               | 10     | 24.80% | 149     | 16313    | 4.5 U  | peptidyl-prolyl cis-trans isomerase [Thermus thermophilus HB8] |        |      |   |                            |
| *               | 307.3153.3153.2 | 3.1728 | 0.4222 | 2545.56 | 2544.783 | 11217  | 1                                                              | 641.7  | 38.1 | 1 | R.YTLQVEGEVLDQGELSYLHGHR.N |
| *               | 306.2565.2565.2 | 4.2934 | 0.3774 | 1696.07 | 1696.863 | 7240.4 | 1                                                              | 1679.2 | 75   | 6 | K.VREATPEELLHGHAH.-        |
| *               | 305.2536.2536.3 | 4.8363 | 0.3571 | 1696.33 | 1696.863 | 7016.9 | 1                                                              | 2786.1 | 60.7 | 3 | K.VREATPEELLHGHAH.-        |
| gj 55981573 ref | 1               | 2      | 23.90% | 88      | 9652     | 5.3 U  | hypothetical protein TTHA1604 [Thermus thermophilus HB8]       |        |      |   |                            |
| *               | 305.4319.4319.2 | 3.0205 | 0.258  | 2287.26 | 2288.652 | 6443.5 | 2                                                              | 375.7  | 35   | 2 | K.NEFILDFALLQPQGGALVSR.I   |
| gj 55981651 ref | 3               | 7      | 23.80% | 122     | 13303    | 9.8 U  | 50S ribosomal protein L14 [Thermus thermophilus HB8]           |        |      |   |                            |
| *               | 107.2572.2572.1 | 2.9036 | 0.4019 | 1321.36 | 1322.544 | 9133.6 | 1                                                              | 742.7  | 58.3 | 3 | K.YATVGDVIVASVK.E          |
| *               | 107.2573.2573.2 | 3.787  | 0.4344 | 1324.66 | 1322.544 | 5277.8 | 1                                                              | 1161.9 | 83.3 | 1 | K.YATVGDVIVASVK.E          |
| *               | 103.2377.2377.2 | 4.7891 | 0.3297 | 1829.72 | 1830.007 | 7252.7 | 1                                                              | 1630.3 | 73.3 | 3 | R.FDDNAAVIINNQLEPR.G       |
| gj 5000000065   | 2               | 6      | 22.70% | 88      | 10331    | 8.7 U  | Translation: 56049..56315 (direct), 89 amino acids             |        |      |   |                            |
| *               | 306.2702.2702.1 | 2.0702 | 0.1978 | 1062.26 | 1063.328 | 4062.7 | 1                                                              | 440    | 71.4 | 2 | K.LIHYYIK.S                |
| *               | 203.2706.2706.2 | 3.7582 | 0.3058 | 1419.55 | 1419.581 | 8003.6 | 1                                                              | 1410.2 | 77.3 | 4 | K.DLCVQLDDISIK.S           |
| gj 5000000053   | 2               | 7      | 22.40% | 161     | 18882    | 4.6 U  | Translation: 43940..44425 (direct), 162 amino acids            |        |      |   |                            |
| *               | 303.4264.4264.2 | 4.8947 | 0.5352 | 2036.12 | 2036.248 | 8213   | 1                                                              | 1161.5 | 62.5 | 6 | K.NFGFIEDNVLVSFQDYK.N      |
| *               | 305.4470.4470.2 | 2.8314 | 0.3155 | 2119.16 | 2118.346 | 10346  | 1                                                              | 578.5  | 41.7 | 1 | K.ASLVSNEQTETIEINLDLK.V    |

|                 |                 |        |        |         |          |        |                                                          |        |      |    |                              |
|-----------------|-----------------|--------|--------|---------|----------|--------|----------------------------------------------------------|--------|------|----|------------------------------|
| gj 55981645 ref | 4               | 7      | 21.40% | 112     | 12612    | 11 U   | 50S ribosomal protein L18 [Thermus thermophilus HB8]     |        |      |    |                              |
| *               | 303.2263.2263.2 | 3.9024 | 0.4338 | 1345.19 | 1345.495 | 4298.2 | 1                                                        | 1065.7 | 90   | 1  | K.HIYAQIIDDEK.G              |
| *               | 303.2668.2670.1 | 1.9478 | 0.2463 | 1245.24 | 1246.49  | 8491.3 | 2                                                        | 445.3  | 50   | 1  | K.GVTLVSASSLALK.L            |
| *               | 303.2679.2679.2 | 3.2614 | 0.418  | 1245.83 | 1246.49  | 6360.8 | 1                                                        | 1318.1 | 79.2 | 3  | K.GVTLVSASSLALK.L            |
| *               | 107.2520.2520.2 | 4.3767 | 0.5314 | 1247.21 | 1246.49  | 7258.5 | 1                                                        | 1497.9 | 79.2 | 2  | K.GVTLVSASSLALK.L            |
| gj 55981107 ref | 1               | 8      | 20.20% | 89      | 10554    | 10.5 U | 30S ribosomal protein S15 [Thermus thermophilus HB8]     |        |      |    |                              |
| *               | 305.3274.3274.2 | 4.5488 | 0.4615 | 1904.54 | 1905.158 | 10913  | 1                                                        | 1877.8 | 61.8 | 8  | R.FPGDTGSTEVQVALLTLR.I       |
| gj 5000000154   | 1               | 2      | 19.80% | 116     | 13449    | 4.7 U  | Translation: 137294..137644 (direct), 117 amino acids    |        |      |    |                              |
| *               | 302.3559.3559.2 | 3.2205 | 0.417  | 2490.66 | 2490.778 | 10530  | 1                                                        | 352.8  | 31.8 | 2  | R.GAVNILNSDFPDGNLAVYNIINR.E  |
| gj 55981752 ref | 1               | 4      | 19.80% | 101     | 11047    | 10.1 U | 50S ribosomal protein L21 [Thermus thermophilus HB8]     |        |      |    |                              |
| *               | 107.2847.2847.2 | 5.0531 | 0.4024 | 2021.7  | 2022.346 | 6668.7 | 1                                                        | 1121.9 | 60.5 | 4  | K.LDAEPGATVELPVLLLGGEK.T     |
| gj 5000000050   | 4               | 10     | 19.40% | 490     | 55567    | 6.4 U  | Translation: 41010..42482 (direct), 491 amino acids      |        |      |    |                              |
| *               | 204.2131.2131.2 | 3.0901 | 0.4449 | 1492.75 | 1491.65  | 7687.7 | 1                                                        | 639.9  | 53.8 | 1  | K.ASSIEGFCPLGQK.I            |
|                 |                 |        |        |         |          |        |                                                          |        |      |    | R.GVGYASSADYSFLGSYLHGTYGLQ   |
| *               | 303.3183.3183.3 | 6.4956 | 0.5174 | 3500.99 | 3501.701 | 6358.1 | 1                                                        | 1260.3 | 32   | 2  | NIDDENGTK.T                  |
| *               | 305.2838.2839.2 | 5.5628 | 0.6077 | 2312.41 | 2312.585 | 8743.6 | 1                                                        | 1286.9 | 50   | 5  | K.TIFITGGSTNSVHILSGNYTK.V    |
|                 |                 |        |        |         |          |        |                                                          |        |      |    | K.NSISGYTTSPDSDKPPVMFPIIVTMR |
| *               | 305.3338.3338.3 | 5.0271 | 0.4434 | 2838.13 | 2837.322 | 7001.9 | 1                                                        | 1074.1 | 32   | 2  | .G                           |
| gj 55981657 ref | 1               | 2      | 19.40% | 93      | 10581    | 10.1 U | 30S ribosomal protein S19 [Thermus thermophilus HB8]     |        |      |    |                              |
| *               | 304.2523.2524.2 | 5.6354 | 0.5723 | 1917.1  | 1917.23  | 4721.2 | 1                                                        | 1180.7 | 70.6 | 2  | R.STIVPEMVGHTIAVYNGK.Q       |
| gj 55981636 ref | 2               | 46     | 18.30% | 126     | 14305    | 11.1 U | 30S ribosomal protein S13 [Thermus thermophilus HB8]     |        |      |    |                              |
| *               | 306.3027.3027.2 | 4.6033 | 0.5622 | 1568.44 | 1568.856 | 8337.7 | 1                                                        | 2675.5 | 84.6 | 43 | K.RVDVALTYIYGIGK.A           |
| *               | 304.2064.2064.2 | 3.2677 | 0.2773 | 1183.94 | 1184.365 | 4134.9 | 1                                                        | 880.7  | 93.8 | 3  | K.RLMDIGCYR.G                |
| gj 55981918 ref | 5               | 16     | 18.10% | 415     | 45474    | 9.4 U  | hypothetical protein TTHA1949 [Thermus thermophilus HB8] |        |      |    |                              |
| *               | 303.3355.3355.2 | 4.3975 | 0.4215 | 1723.83 | 1722.04  | 6031.3 | 1                                                        | 1216.1 | 71.4 | 3  | R.IVWSPYVFLNANAK.A           |
| *               | 306.2563.2563.2 | 3.7745 | 0.4289 | 1382.34 | 1382.565 | 6648.6 | 1                                                        | 1302.9 | 75   | 6  | R.RVGDVHWALSGGK.L            |
| *               | 303.4457.4457.2 | 4.5203 | 0.4359 | 2160.21 | 2159.534 | 9951.7 | 1                                                        | 1070.6 | 47.4 | 3  | R.VIATNYGNNVITVIDLLGLR.T     |
| *               | 305.4415.4415.3 | 4.3606 | 0.3198 | 2161.26 | 2159.534 | 11561  | 1                                                        | 2168.9 | 42.1 | 2  | R.VIATNYGNNVITVIDLLGLR.T     |
|                 |                 |        |        |         |          |        |                                                          |        |      |    | K.VIETGQTNGGGQVLNVWTVNFEEL   |
| *               | 304.4099.4099.2 | 3.5126 | 0.4528 | 2917.47 | 2916.22  | 6734.2 | 1                                                        | 413.6  | 30.8 | 2  | PRG.-                        |
| gj 5000000067   | 2               | 10     | 18.10% | 216     | 23927    | 4.8 U  | Translation: 57104..57754 (reverse), 217 amino acids     |        |      |    |                              |
|                 |                 |        |        |         |          |        |                                                          |        |      |    | R.PVWGIGEPTNPIVVPNNYSATISIR  |
| *               | 303.3195.3195.2 | 3.8674 | 0.5344 | 2782.11 | 2783.156 | 4341.1 | 1                                                        | 545.9  | 46   | 4  | .M                           |
| *               | 303.0216.0218.2 | 4.097  | 0.3128 | 1255.05 | 1255.457 | 9048.6 | 3                                                        | 1386   | 70.8 | 6  | R.GLIENLANALLGG.-            |
| gj 55981662 ref | 1               | 4      | 18.10% | 105     | 11930    | 11.1 U | 30S ribosomal protein S10 [Thermus thermophilus HB8]     |        |      |    |                              |
| *               | 305.0526.0526.2 | 4.147  | 0.4206 | 2142.97 | 2144.529 | 6607.4 | 1                                                        | 797.8  | 52.8 | 4  | K.TIEQLMTLDLPTGVEIEIK.T      |
| gj 55981298 ref | 8               | 17     | 17.30% | 446     | 50557    | 6.7 U  | glutamine synthetase [Thermus thermophilus HB8]          |        |      |    |                              |
| *               | 306.3270.3270.2 | 4.3752 | 0.5514 | 2374.22 | 2374.744 | 6207.3 | 1                                                        | 1014.3 | 57.9 | 1  | K.KLGFDNLYAGPEPEFFLFLR.T     |
| *               | 305.4616.4616.2 | 3.7448 | 0.3433 | 2247.01 | 2246.57  | 5455.8 | 1                                                        | 836.9  | 58.3 | 3  | K.LGFDNLYAGPEPEFFLFLR.T      |
| *               | 306.2667.2667.1 | 2.9047 | 0.4166 | 1532.32 | 1532.829 | 3902.1 | 1                                                        | 391    | 57.7 | 2  | R.IALNHGLHATFLPK.P           |
| *               | 305.2623.2623.2 | 4.0642 | 0.5145 | 1533.03 | 1532.829 | 6527   | 1                                                        | 988.2  | 65.4 | 3  | R.IALNHGLHATFLPK.P           |
| *               | 305.2627.2627.3 | 4.1481 | 0.4643 | 1533.38 | 1532.829 | 4309.7 | 1                                                        | 982    | 53.8 | 2  | R.IALNHGLHATFLPK.P           |
| *               | 305.2283.2283.2 | 3.7883 | 0.385  | 2105.46 | 2105.318 | 5766.9 | 1                                                        | 435.3  | 50   | 3  | K.RLTPGYEAPTNIAWSASNR.S      |

|                 |                 |        |        |         |          |        |   |                                                                                             |      |    |                                                          |  |
|-----------------|-----------------|--------|--------|---------|----------|--------|---|---------------------------------------------------------------------------------------------|------|----|----------------------------------------------------------|--|
| *               | 305.1814.1814.2 | 2.9053 | 0.1108 | 1055.12 | 1055.266 | 6509.2 | 7 | 818.9                                                                                       | 75   | 1  | K.IRELPGTLR.E                                            |  |
| *               | 305.2674.2674.2 | 3.9208 | 0.5108 | 1742.98 | 1743.96  | 7273   | 1 | 1352.1                                                                                      | 75   | 2  | R.EALGEHVYTHFLQAK.Q                                      |  |
| gi 5000000077   | 1               | 13     | 16.50% | 121     | 14307    | 4.6 U  |   | Translation: 74931..75296 (reverse), 122 amino acids                                        |      |    |                                                          |  |
| *               | 305.3867.3867.2 | 4.2579 | 0.4838 | 2275    | 2276.461 | 8477.2 | 1 | 1494.2                                                                                      | 57.9 | 13 | K.FAEYLSGLSALVEFEQNDDK.F                                 |  |
| gi 55981455 ref | 1               | 1      | 16.30% | 129     | 14369    | 5.2 U  |   | hypothetical protein TTHA1486 [Thermus thermophilus HB8]                                    |      |    |                                                          |  |
| *               | 305.3039.3039.3 | 4.0113 | 0.4479 | 2264.07 | 2262.574 | 5836.5 | 1 | 789.2                                                                                       | 36.2 | 1  | R.RGASLPPAPKPEEGGWETLLR.L                                |  |
| gi 55981661 ref | 2               | 12     | 16.00% | 206     | 22408    | 10.4 U |   | 50S ribosomal protein L3 [Thermus thermophilus HB8]                                         |      |    |                                                          |  |
| *               | 207.2638.2640.2 | 4.3493 | 0.5056 | 1777.06 | 1777.127 | 6359.5 | 1 | 934.1                                                                                       | 59.4 | 1  | R.AVPVTVILAGPCPVVQR.R                                    |  |
| *               | 106.2744.2744.2 | 4.7109 | 0.4869 | 1748.89 | 1748.976 | 6099   | 1 | 1155.4                                                                                      | 63.3 | 11 | K.DGYTAVQLGFLPQNPK.R                                     |  |
| gi 55981004 ref | 2               | 11     | 15.90% | 88      | 10387    | 10.6 U |   | 30S ribosomal protein S16 [Thermus thermophilus HB8]                                        |      |    |                                                          |  |
| *               | 106.2641.2641.1 | 3.1771 | 0.4135 | 1564.7  | 1565.726 | 4010.6 | 1 | 340.8                                                                                       | 61.5 | 1  | R.YWLSVGAQPTDTAR.R                                       |  |
| *               | 105.1986.1986.2 | 4.2233 | 0.4436 | 1565.18 | 1565.726 | 6193.8 | 1 | 1748.7                                                                                      | 84.6 | 10 | R.YWLSVGAQPTDTAR.R                                       |  |
| gi 55981603 ref | 5               | 11     | 15.00% | 622     | 70470    | 9 U    |   | peptide ABC transporter, peptide-binding protein [Thermus thermophilus HB8]                 |      |    |                                                          |  |
| *               | 305.3863.3864.2 | 3.9329 | 0.504  | 2862.03 | 2863.195 | 4320.8 | 1 | 663.4                                                                                       | 45.7 | 3  | R.NFTLIFEPAYYYDTPINTYAPK.H<br>K.RWVPGNSIEMERNPNFPIKPEGGE |  |
| *               | 305.2911.2911.3 | 4.8819 | 0.4029 | 2970.17 | 2970.332 | 7152.9 | 1 | 453.1                                                                                       | 26   | 4  | SK.Y<br>K.AFFDGLQPVAHTWIAPVNPLFNPV                       |  |
| *               | 306.3071.3071.2 | 5.8546 | 0.5474 | 2892.34 | 2894.348 | 9086.1 | 1 | 1204.6                                                                                      | 44   | 2  | K.K<br>K.AFFDGLQPVAHTWIAPVNPLFNPV                        |  |
| *               | 306.3070.3070.3 | 5.5634 | 0.4425 | 2895.11 | 2894.348 | 7225.9 | 1 | 907.5                                                                                       | 31   | 1  | K.K                                                      |  |
| *               | 303.3051.3051.2 | 2.8738 | 0.3957 | 1892.38 | 1892.122 | 7504.2 | 1 | 868.9                                                                                       | 56.2 | 1  | K.INNAPSAVVFADEFIQR.A                                    |  |
| gi 55981643 ref | 1               | 1      | 15.00% | 60      | 6785     | 10.2 U |   | 50S ribosomal protein L30 [Thermus thermophilus HB8]                                        |      |    |                                                          |  |
| *               | 103.1802.1802.2 | 2.8687 | 0.1857 | 1013.75 | 1014.167 | 3777.7 | 1 | 837.7                                                                                       | 87.5 | 1  | R.VLEDTPAIR.G                                            |  |
| gi 55981659 ref | 1               | 1      | 14.60% | 96      | 10737    | 10.2 U |   | 50S ribosomal protein L23 [Thermus thermophilus HB8]                                        |      |    |                                                          |  |
| *               | 106.2872.2872.2 | 3.7306 | 0.4025 | 1519.5  | 1519.778 | 6781.9 | 1 | 610.5                                                                                       | 53.8 | 1  | K.TAYDVILAPVLSEK.A                                       |  |
| gi 55981318 ref | 1               | 2      | 14.40% | 97      | 10452    | 10.2 U |   | DNA-binding protein HU (DNA-binding protein II) [Thermus thermophilus HB8]                  |      |    |                                                          |  |
| *               | 205.2946.2948.2 | 4.1378 | 0.4225 | 1429.79 | 1429.613 | 8245.2 | 1 | 1926                                                                                        | 80.8 | 2  | K.ADLVDQVAQATGLK.K                                       |  |
| gi 55980228 ref | 2               | 5      | 13.70% | 322     | 35749    | 8.7 U  |   | phosphate ABC transporter, periplasmic phosphate-binding protein [Thermus thermophilus HB8] |      |    |                                                          |  |
| *               | 306.0511.0511.2 | 4.5193 | 0.4909 | 2301.98 | 2303.707 | 3669.9 | 1 | 725                                                                                         | 60   | 3  | K.AGIQFIEIPVAYDALSILVNR.Q                                |  |
| *               | 305.4623.4623.2 | 4.2981 | 0.4728 | 2468.95 | 2469.771 | 8921.4 | 1 | 1542.1                                                                                      | 56.8 | 2  | R.IVLFAGAGTDSGTFDYFTEAMGR.A                              |  |
| gi 55980526 ref | 2               | 4      | 13.70% | 204     | 23230    | 6.9 U  |   | superoxide dismutase [Mn] [Thermus thermophilus HB8]                                        |      |    |                                                          |  |
| *               | 303.2271.2271.2 | 3.7387 | 0.4702 | 1536.59 | 1533.771 | 4475.5 | 1 | 850.3                                                                                       | 76.9 | 1  | R.HLAALPQDIQTAVR.N                                       |  |
| *               | 306.2727.2729.2 | 4.5671 | 0.4916 | 1610.51 | 1609.747 | 5924.1 | 1 | 1031.4                                                                                      | 73.1 | 3  | R.NNGGGHLNHSFLWR.L                                       |  |
| gi 55981840 ref | 3               | 3      | 13.00% | 346     | 35975    | 4.5 U  |   | hypothetical protein TTHA1871 [Thermus thermophilus HB8]                                    |      |    |                                                          |  |
| *               | 306.3175.3175.2 | 2.6706 | 0.277  | 1972.12 | 1973.326 | 6479.5 | 1 | 565.3                                                                                       | 52.8 | 1  | R.TLLSGGQPAAFVSWVALR.H<br>R.HYGTGSAGCLGQGPVSFQAVLYPD     |  |
| *               | 305.3072.3072.2 | 4.0586 | 0.4732 | 2694.19 | 2695.917 | 10679  | 1 | 1919.1                                                                                      | 50   | 1  | GR.V<br>R.HYGTGSAGCLGQGPVSFQAVLYPD                       |  |
| *               | 305.3063.3064.3 | 3.961  | 0.4189 | 2695.82 | 2695.917 | 7034.7 | 1 | 860.8                                                                                       | 30   | 1  | GR.V                                                     |  |
| gi 55981635 ref | 1               | 1      | 12.40% | 129     | 13713    | 10.4 U |   | 30S ribosomal protein S11 [Thermus thermophilus HB8]                                        |      |    |                                                          |  |
| *               | 304.2259.2259.2 | 3.6186 | 0.472  | 1589.29 | 1589.832 | 6903   | 1 | 1467                                                                                        | 73.3 | 1  | R.KGTPYAAQLAALDAAK.K                                     |  |
| gi 55980325 ref | 3               | 5      | 11.90% | 429     | 48119    | 9.4 U  |   | ABC transporter, periplasmic substrate-binding protein [Thermus thermophilus HB8]           |      |    |                                                          |  |
| *               | 303.3696.3696.2 | 3.1572 | 0.4402 | 1878.06 | 1878.178 | 5124.1 | 1 | 488.5                                                                                       | 53.3 | 1  | K.LTSLPFFTDAGILYYR.K                                     |  |

|                 |                 |        |        |         |          |        |                                                                                      |        |      |   |                                             |
|-----------------|-----------------|--------|--------|---------|----------|--------|--------------------------------------------------------------------------------------|--------|------|---|---------------------------------------------|
| *               | 306.2526.2526.3 | 3.7621 | 0.2111 | 1857.64 | 1858.151 | 7420.7 | 1                                                                                    | 1024.8 | 41.7 | 1 | R.LPTRPALYTDTRDVLAR.N                       |
| *               | 305.4520.4520.2 | 3.9514 | 0.5061 | 2191.18 | 2190.42  | 7447.8 | 1                                                                                    | 740.7  | 50   | 3 | R.YNQVSEAIWTEVHSVLTGR.K                     |
| gi 5000000079   | 2               | 6      | 11.80% | 287     | 33357    | 5.2 U  | Translation: 79880..80743 (reverse), 288 amino acids                                 |        |      |   |                                             |
| *               | 302.2920.2920.2 | 5.3717 | 0.5479 | 2689.94 | 2690.79  | 5454   | 1                                                                                    | 953.3  | 50   | 2 | K.DQGLFYDPTIDIYDDEGNIDENK.V                 |
| *               | 206.2753.2753.2 | 3.5632 | 0.3957 | 1212.32 | 1211.403 | 5739.3 | 1                                                                                    | 1025.4 | 80   | 4 | K.VGEFFGLNLSK.N                             |
| gi 55981658 ref | 1               | 2      | 11.60% | 276     | 30468    | 11.1 U | 50S ribosomal protein L2 [Thermus thermophilus HB8]                                  |        |      |   |                                             |
| *               | 306.2851.2851.3 | 7.7284 | 0.5478 | 3328.08 | 3327.855 | 8088   | 1                                                                                    | 2411.1 | 36.3 | 2 | K.RYIAPDGLQVGQQVAGPDAPIQV<br>GNALPLR.F      |
| gi 55981558 ref | 1               | 1      | 11.20% | 206     | 23205    | 5.3 U  | 50S ribosomal protein L25 (TL5) [Thermus thermophilus HB8]                           |        |      |   |                                             |
| *               | 306.3023.3023.2 | 3.7589 | 0.3168 | 2525.43 | 2523.938 | 5850.7 | 1                                                                                    | 331.6  | 38.6 | 1 | R.QASIHVIVLELDPDQQLPTLVR.Q                  |
| gi 5000000001   | 7               | 15     | 11.10% | 881     | 102237   | 8.5 U  | Translation: 1941..4586 (reverse), 882 amino acids                                   |        |      |   |                                             |
| *               | 307.3019.3019.3 | 5.1396 | 0.4871 | 2785.02 | 2784.291 | 4957.5 | 1                                                                                    | 1239.8 | 40.6 | 3 | K.VPPGYILLHKPTGMFFPPESSPGW<br>K.G           |
| *               | 205.2846.2848.2 | 3.6166 | 0.3918 | 1528.48 | 1528.702 | 10979  | 1                                                                                    | 1715.3 | 75   | 1 | K.FLNSAQDLTDYLK.T                           |
| *               | 204.1991.1991.2 | 4.0129 | 0.4345 | 1279.44 | 1279.433 | 6330.3 | 1                                                                                    | 1240.7 | 79.2 | 2 | K.SLSSGVSLSNLSK.Q                           |
| *               | 304.2507.2507.3 | 3.6984 | 0.3016 | 1861.9  | 1860.12  | 10238  | 1                                                                                    | 1390   | 43.3 | 1 | R.KGNFISVPIHEEFVDK.G                        |
| *               | 207.2772.2772.2 | 3.4054 | 0.1505 | 1350.49 | 1349.575 | 7505.8 | 1                                                                                    | 1058.2 | 75   | 4 | K.GQQNYFLPILR.V                             |
| *               | 204.2488.2488.2 | 3.1348 | 0.435  | 1126.41 | 1125.269 | 5521.3 | 1                                                                                    | 725.1  | 77.8 | 2 | K.SGPVDFDFTVR.E                             |
| *               | 204.3010.3010.2 | 3.0315 | 0.2319 | 1217.24 | 1217.491 | 4271.7 | 2                                                                                    | 868.5  | 77.8 | 2 | K.EVIPIIYELK.A                              |
| gi 55979996 ref | 1               | 1      | 11.10% | 316     | 35882    | 5.6 U  | probable potassium channel, beta subunit (oxidoreductase) [Thermus thermophilus HB8] |        |      |   |                                             |
| *               | 305.3138.3138.3 | 3.9007 | 0.2807 | 3603.15 | 3604.055 | 5252.7 | 1                                                                                    | 510.4  | 22.8 | 1 | R.LPGISSAITGATRPEQIRENLGAAGV<br>DLPQEALEK.I |
| gi 55980600 ref | 1               | 1      | 10.60% | 188     | 19689    | 7.5 U  | heat shock protein HsIV [Thermus thermophilus HB8]                                   |        |      |   |                                             |
| *               | 103.2537.2537.2 | 3.8837 | 0.4932 | 1978.38 | 1978.21  | 6442.5 | 1                                                                                    | 1041.3 | 57.9 | 1 | K.DGVTALAGDQGVTFGQTVLK.R                    |
| gi 55980215 ref | 2               | 3      | 10.50% | 229     | 24831    | 9.5 U  | 50S ribosomal protein L1 [Thermus thermophilus HB8]                                  |        |      |   |                                             |
| *               | 303.2880.2880.2 | 3.3947 | 0.3364 | 1347.29 | 1347.557 | 6149.1 | 1                                                                                    | 1129   | 75   | 2 | K.AGTVGFNIGEIR.E                            |
| *               | 304.1504.1504.2 | 3.1135 | 0.2789 | 1151.51 | 1151.308 | 8978.8 | 1                                                                                    | 1199.5 | 75   | 1 | R.ALEAHKPEGAK.G                             |
| gi 5000000153   | 1               | 4      | 10.00% | 299     | 33193    | 7.3 U  | Translation: 136388..137287 (direct), 300 amino acids                                |        |      |   |                                             |
| *               | 306.3325.3325.3 | 6.2743 | 0.439  | 3458.67 | 3459.973 | 10176  | 1                                                                                    | 1314.4 | 30.2 | 4 | K.EDNTPIVLRPQASNAPLFPQSYLP<br>FILFR.Y       |
| gi 5000000051   | 2               | 2      | 10.00% | 290     | 30341    | 5.1 U  | Translation: 42536..43408 (direct), 291 amino acids                                  |        |      |   |                                             |
| *               | 304.4110.4110.2 | 2.5908 | 0.3581 | 1838.21 | 1838.07  | 8209.3 | 1                                                                                    | 742.7  | 53.1 | 1 | R.SVIFNILGLDFGNADNK.W                       |
| *               | 305.3874.3874.2 | 2.5453 | 0.3847 | 1520.12 | 1518.795 | 6401.8 | 1                                                                                    | 495.3  | 63.6 | 1 | K.VPFYNLTFLFEK.Y                            |
| gi 55981660 ref | 1               | 5      | 9.50%  | 210     | 23235    | 10 U   | 50S ribosomal protein L4 [Thermus thermophilus HB8]                                  |        |      |   |                                             |
| *               | 106.2845.2847.2 | 5.3218 | 0.3665 | 2058.14 | 2059.281 | 6888.6 | 1                                                                                    | 1670.7 | 68.4 | 5 | K.EAGLDGSESVLLVTGNELVR.R                    |
| gi 55981900 ref | 2               | 4      | 9.50%  | 210     | 22553    | 6.2 U  | quinol-cytochrome c reductase, Rieske iron-sulfur subunit [Thermus thermophilus HB8] |        |      |   |                                             |
| *               | 307.2586.2586.3 | 3.5656 | 0.2983 | 2087.97 | 2087.479 | 5173.2 | 1                                                                                    | 1171.2 | 42.1 | 1 | R.HGAQVIAGPPPRPVPQLPVR.V                    |
| *               | 307.2601.2602.2 | 3.6258 | 0.3069 | 2088.93 | 2087.479 | 9315.3 | 2                                                                                    | 589.3  | 44.7 | 3 | R.HGAQVIAGPPPRPVPQLPVR.V                    |
| gi 55981632 ref | 1               | 1      | 9.30%  | 118     | 13715    | 11.4 U | 50S ribosomal protein L17 [Thermus thermophilus HB8]                                 |        |      |   |                                             |
| *               | 306.2859.2859.2 | 3.8221 | 0.4757 | 1249.79 | 1250.486 | 9605.8 | 1                                                                                    | 2026.1 | 85   | 1 | R.GFVDHLIHLAK.R                             |
| gi 55980715 ref | 1               | 2      | 8.50%  | 284     | 31512    | 8.8 U  | iron ABC transporter, substrate-binding protein [Thermus thermophilus HB8]           |        |      |   |                                             |
| *               | 303.4429.4429.2 | 3.8328 | 0.4275 | 2688.73 | 2689.077 | 5828.5 | 1                                                                                    | 519.6  | 41.3 | 2 | R.VYIEIDPTPYTVGPESFIGVLISK.A                |
| gi 5000000144   | 1               | 1      | 8.20%  | 316     | 36357    | 5.4 U  | Translation: 125598..126548 (reverse), 317 amino acids                               |        |      |   |                                             |

|                 | R.SFGIEGFNASFGNNGLLYENLYNEY |        |        |         |          |        |   |        |      |                                                                |
|-----------------|-----------------------------|--------|--------|---------|----------|--------|---|--------|------|----------------------------------------------------------------|
| *               | 303.3818.3818.2             | 4.9664 | 0.5656 | 2962.19 | 2962.201 | 8814.3 | 1 | 936.8  | 40   | 1 K.E                                                          |
| gi 55981666 ref | 2                           | 4      | 8.10%  | 135     | 14883    | 11 U   |   |        |      | 30S ribosomal protein S12 [Thermus thermophilus HB8]           |
| *               | 103.1585.1585.1             | 2.3084 | 0.2432 | 879.45  | 879.988  | 7378   | 1 | 745.7  | 75   | 1 R.GVYDAAGVK.D                                                |
| *               | 104.1622.1622.2             | 2.917  | 0.3799 | 1151.55 | 1151.264 | 6919.9 | 1 | 830.8  | 70   | 3 R.GVYDAAGVKDR.K                                              |
| gi 55981487 ref | 1                           | 3      | 8.00%  | 237     | 26218    | 5.7 U  |   |        |      | 2-haloalkanoic acid dehalogenase-related protein [Thermus the  |
| *               | 306.2965.2966.2             | 4.9891 | 0.3551 | 1948.18 | 1947.331 | 4679.5 | 1 | 858.6  | 63.9 | 3 R.IFALLGAPHDPGLIALTAR.R                                      |
| gi 55981642 ref | 1                           | 4      | 8.00%  | 150     | 16281    | 11.2 U |   |        |      | 50S ribosomal protein L15 [Thermus thermophilus HB8]           |
| *               | 106.2689.2689.2             | 3.6536 | 0.4138 | 1388.99 | 1389.591 | 6211.3 | 1 | 1522.4 | 86.4 | 4 R.FEGEVTPELLVR.A                                             |
| gi 55981067 ref | 3                           | 7      | 7.80%  | 395     | 42201    | 4.7 U  |   |        |      | membrane lipoprotein [Thermus thermophilus HB8]                |
| *               | 305.3391.3391.3             | 3.878  | 0.4641 | 1755.16 | 1755.128 | 4302.6 | 1 | 888.6  | 46.9 | 2 R.TGVVVGFIGGMDIPLIHK.F                                       |
| *               | 305.3382.3382.2             | 4.5781 | 0.4426 | 1755.64 | 1755.128 | 5639.3 | 1 | 1228.3 | 68.8 | 4 R.TGVVVGFIGGMDIPLIHK.F                                       |
| *               | 103.2099.2101.2             | 3.8883 | 0.3919 | 1568.63 | 1568.77  | 6954.7 | 1 | 822    | 65.4 | 1 K.QAIINGEIQVPETR.-                                           |
| gi 55980256 ref | 2                           | 2      | 7.70%  | 455     | 49058    | 7.2 U  |   |        |      | 2-oxoglutarate dehydrogenase E3 component (dihydrolipoamide    |
| *               | 304.3911.3913.2             | 3.3743 | 0.4138 | 2474.29 | 2474.862 | 4957.5 | 4 | 168.4  | 31   | 1 R.YILIATGSAPLIPPWAQVDYER.V                                   |
| *               | 306.2679.2679.2             | 2.6836 | 0.3882 | 1401.04 | 1400.621 | 4724.2 | 1 | 479.1  | 62.5 | 1 R.APHAHPSLSEILK.E                                            |
| gi 55980220 ref | 2                           | 5      | 7.60%  | 406     | 44782    | 5.6 U  |   |        |      | translation elongation factor EF-Tu.B [Thermus thermophilus HB |
| gi 55981663 ref | 2                           | 5      | 7.60%  | 406     | 44782    | 5.6 U  |   |        |      | elongation factor Tu (EF-Tu) [Thermus thermophilus HB8]        |
| YS40_lysate_Ti  | 304.3679.3679.2             | 2.5075 | 0.2089 | 1723.84 | 1723.04  | 3750.7 | 3 | 341.9  | 53.6 | 1 K.PFLMPVEDVFTITGR.G                                          |
| YS40_lysate_Ti  | 205.2581.2581.2             | 3.3904 | 0.3544 | 1655.37 | 1655.892 | 6545.3 | 1 | 773.5  | 56.7 | 4 K.TLQEGIAGDNVGVLLR.G                                         |
| gi 5000000002   | 5                           | 11     | 7.30%  | 945     | 108509   | 5.2 U  |   |        |      | Translation: 4573..7410 (reverse), 946 amino acids             |
| *               | 305.3923.3923.2             | 4.0296 | 0.3676 | 2134.05 | 2134.362 | 4649.6 | 1 | 476.5  | 59.4 | 4 K.ERDWWNIIQQQLNTGFR.S                                        |
| *               | 305.3934.3934.3             | 5.0415 | 0.4252 | 2135.85 | 2134.362 | 10138  | 1 | 2092.5 | 46.9 | 3 K.ERDWWNIIQQQLNTGFR.S<br>K.SVGLDSVSEFIENNSQTDVEVSAK.         |
| *               | 307.2826.2826.2             | 3.3807 | 0.3338 | 2557.06 | 2555.712 | 8126.9 | 1 | 470.1  | 34.8 | 2 D                                                            |
| *               | 302.2168.2168.2             | 2.9834 | 0.4674 | 1775.25 | 1775.907 | 7785.4 | 1 | 805.3  | 57.1 | 1 K.YNSLVEDETIYATEK.D                                          |
| *               | 203.2544.2546.2             | 2.9095 | 0.3163 | 1624.01 | 1623.67  | 8652.6 | 1 | 909.5  | 58.3 | 1 K.NYDSFDYLDDVEK.L                                            |
| gi 5000000155   | 1                           | 2      | 7.30%  | 287     | 33770    | 5.3 U  |   |        |      | Translation: 137634..138497 (direct), 288 amino acids          |
| *               | 304.4331.4331.2             | 2.802  | 0.3055 | 2402.73 | 2400.731 | 7235.3 | 2 | 263.5  | 32.5 | 2 R.SYLLSLTSDAFYIEDPILPNK.E                                    |
| gi 55981453 ref | 2                           | 7      | 7.30%  | 137     | 15743    | 6.2 U  |   |        |      | small heat shock protein, HSP20 family [Thermus thermophilus   |
| *               | 306.2810.2810.1             | 2.3374 | 0.3421 | 1140.43 | 1141.405 | 3834.6 | 3 | 316.1  | 66.7 | 2 R.HGVLHLLVPR.A                                               |
| *               | 306.2805.2805.2             | 4.0323 | 0.5055 | 1140.97 | 1141.405 | 7579.5 | 1 | 1910.2 | 94.4 | 5 R.HGVLHLLVPR.A                                               |
| gi 5000000076   | 8                           | 14     | 7.20%  | 1744    | 200633   | 4.7 U  |   |        |      | Translation: 69684..74918 (reverse), 1745 amino acids          |
| *               | 204.2996.2996.2             | 2.6178 | 0.4101 | 1779.18 | 1779.849 | 10862  | 1 | 820.8  | 50   | 1 K.EGSEALEEISEELESK.E                                         |
| *               | 304.4023.4023.2             | 2.5362 | 0.2794 | 1787.33 | 1787.923 | 8015   | 1 | 376.9  | 46.2 | 1 K.EWEIESYLDSEFVNR.F                                          |
| *               | 203.2575.2575.2             | 3.846  | 0.3604 | 1436.34 | 1436.558 | 6842   | 1 | 1399   | 81.8 | 2 K.EVAFEDLENLEK.T                                             |
| *               | 204.2479.2479.2             | 3.5744 | 0.2506 | 1243.56 | 1243.486 | 4115.2 | 1 | 913.5  | 90   | 4 K.IIGTLQLEDLK.K                                              |
| *               | 203.2379.2379.2             | 3.8706 | 0.5372 | 1856.42 | 1855.95  | 7369.4 | 1 | 1018.7 | 59.4 | 1 K.AVDEAFETISEATSQEK.L                                        |
| *               | 204.1876.1878.2             | 3.8566 | 0.2895 | 1259.61 | 1259.445 | 7381.7 | 1 | 1223.2 | 85   | 1 K.LLNSSIEQLNK.A                                              |
| *               | 304.4323.4325.2             | 4.9773 | 0.5622 | 2341.39 | 2341.622 | 6698.6 | 1 | 1608.7 | 65.8 | 3 K.VSPYFVSIDNAYAYLVDFEK.A                                     |
| *               | 305.4540.4542.2             | 2.8658 | 0.1724 | 2667.1  | 2668.954 | 9847.1 | 1 | 600.7  | 37   | 1 K.IVAVYDLSEEDLSSLIEGLDFDPK.I                                 |
| gi 55980011 ref | 1                           | 1      | 7.10%  | 98      | 10978    | 10.8 U |   |        |      | 50S ribosomal protein L28 [Thermus thermophilus HB8]           |
| *               | 103.1834.1834.1             | 1.9585 | 0.1359 | 907.31  | 908.042  | 5122.3 | 1 | 523.9  | 83.3 | 1 K.VYELVER.A                                                  |

|                 |                 |        |        |         |          |        |                                                                 |        |      |                                 |
|-----------------|-----------------|--------|--------|---------|----------|--------|-----------------------------------------------------------------|--------|------|---------------------------------|
| gj 55981241 ref | 2               | 4      | 6.90%  | 478     | 53160    | 5.4 U  | V-type ATP synthase subunit B [Thermus thermophilus HB8]        |        |      |                                 |
| *               | 304.2496.2496.3 | 3.8008 | 0.3486 | 2050.46 | 2050.409 | 6824.3 | 1                                                               | 1003.9 | 40.3 | 1 R.RFNGIGKPIDGLPPITPEK.R       |
| *               | 306.2737.2737.2 | 3.9533 | 0.3525 | 1517.38 | 1517.858 | 5016.7 | 1                                                               | 856.3  | 73.1 | 3 K.RLPITGLPLNPVAR.R            |
| gj 55981649 ref | 2               | 4      | 6.60%  | 182     | 21030    | 9.7 U  | 50S ribosomal protein L5 [Thermus thermophilus HB8]             |        |      |                                 |
| *               | 303.4125.4125.2 | 3.6246 | 0.4151 | 1276.02 | 1276.564 | 5104.3 | 1                                                               | 1032.5 | 80   | 2 R.ALLELLGFPFR.K               |
| *               | 306.3101.3101.2 | 3.3128 | 0.2679 | 1404.08 | 1404.739 | 5624.4 | 3                                                               | 646    | 63.6 | 2 R.ALLELLGFPFRK.-              |
| gj 55981297 ref | 2               | 3      | 6.50%  | 552     | 59970    | 8.7 U  | 5'-nucleotidase precursor [Thermus thermophilus HB8]            |        |      |                                 |
| *               | 304.4327.4327.2 | 3.5218 | 0.583  | 2480.42 | 2479.754 | 10477  | 1                                                               | 825.3  | 45   | 1 K.NPLFLDAGDVFGQTLYFNQYR.G     |
| *               | 304.2852.2854.2 | 3.3025 | 0.3321 | 1535.43 | 1534.798 | 4402.5 | 1                                                               | 878.2  | 78.6 | 2 K.GLFAPYAVVVGGGER.V           |
| gj 55981434 ref | 1               | 1      | 6.40%  | 140     | 15895    | 10.2 U | 50S ribosomal protein L13 [Thermus thermophilus HB8]            |        |      |                                 |
| *               | 106.2668.2668.1 | 2.4221 | 0.3367 | 1030.56 | 1031.197 | 8035.5 | 1                                                               | 826.4  | 75   | 1 R.WVLIDAEKG.T                 |
| gj 55980240 ref | 3               | 9      | 6.30%  | 543     | 57889    | 5.2 U  | 60 kDa chaperonin (Protein Cpn60) (GroEL protein) [Thermus th   |        |      |                                 |
| *               | 305.2390.2390.3 | 3.9202 | 0.322  | 1330.4  | 1330.446 | 5658.2 | 1                                                               | 2016   | 72.5 | 3 K.HRFEDALNATR.A               |
| *               | 304.2395.2395.2 | 3.6976 | 0.2493 | 1331.78 | 1330.446 | 4724.9 | 1                                                               | 931.8  | 85   | 4 K.HRFEDALNATR.A               |
| *               | 303.4001.4001.2 | 4.3496 | 0.599  | 2402.92 | 2402.681 | 8419.4 | 1                                                               | 980.4  | 45.5 | 2 R.YGFNAATGEFVDMVEAGIVDPAK.V   |
| gj 55981140 ref | 1               | 1      | 6.30%  | 254     | 28308    | 9 U    | amino acid ABC transporter, periplasmic amino acid-binding pro  |        |      |                                 |
| *               | 304.2751.2751.2 | 2.6311 | 0.3427 | 1905.86 | 1904.173 | 4976.8 | 2                                                               | 356.8  | 53.3 | 1 R.KLENTLQVGELVFQER.V          |
| gj 5000000150   | 2               | 6      | 6.20%  | 631     | 71505    | 5.3 U  | Translation: 129964..131859 (direct), 632 amino acids           |        |      |                                 |
| *               | 302.2795.2795.2 | 4.7795 | 0.5557 | 1945.35 | 1945.133 | 6281   | 1                                                               | 1494.1 | 75   | 4 R.FSDLSSLNEENTSFLK.L          |
| *               | 302.2918.2918.2 | 4.2742 | 0.516  | 2444.06 | 2445.688 | 7522.1 | 1                                                               | 867.7  | 45.2 | 2 K.ENIPILYVNGTPQFSSDFSTSK.D    |
| gj 55981871 ref | 2               | 3      | 6.20%  | 520     | 59169    | 6.2 U  | hypothetical protein TTHA1902 [Thermus thermophilus HB8]        |        |      |                                 |
| *               | 302.3099.3099.2 | 4.3929 | 0.4563 | 2516.02 | 2517.714 | 8341.2 | 1                                                               | 990.5  | 47.6 | 2 R.NPETTLQVWSADYGYPGGLYR.E     |
| *               | 306.2559.2559.2 | 2.979  | 0.3703 | 1218.28 | 1218.36  | 3940.6 | 1                                                               | 620.2  | 88.9 | 1 K.DPLSGLHHR.V                 |
| gj 5000000164   | 1               | 3      | 6.20%  | 209     | 23532    | 4.9 U  | Translation: 147677..148306 (direct), 210 amino acids           |        |      |                                 |
| *               | 204.2563.2563.2 | 3.3674 | 0.418  | 1428.12 | 1428.627 | 6172.7 | 1                                                               | 1203   | 75   | 3 K.FVFGDSFTSPPK.I              |
| gj 5000000075   | 6               | 13     | 5.60%  | 1525    | 176943   | 5 U    | Translation: 65085..69662 (reverse), 1526 amino acids           |        |      |                                 |
| *               | 306.2610.2610.2 | 2.8239 | 0.3209 | 1345.43 | 1345.587 | 5817.9 | 1                                                               | 482.4  | 65   | 3 K.RVPEGFVLYHK.D               |
| *               | 205.2892.2892.2 | 3.8147 | 0.3167 | 2247.76 | 2248.454 | 4579.7 | 1                                                               | 672.8  | 58.3 | 2 K.NGVIVNQPDSNWILEEYK.Y        |
| *               | 207.2946.2946.2 | 2.6971 | 0.3743 | 1416.43 | 1416.571 | 9070.7 | 1                                                               | 783.4  | 57.7 | 1 R.NVASDLADLLADAK.A            |
| *               | 304.4127.4127.2 | 4.2785 | 0.3237 | 1392.4  | 1390.666 | 8008.2 | 1                                                               | 1616.9 | 81.8 | 3 K.FVVDIINTLLSR.Y              |
| *               | 306.3109.3109.2 | 5.5072 | 0.6053 | 2258    | 2259.61  | 7328.2 | 1                                                               | 1711.5 | 62.5 | 3 R.IAAANLLTHLANPSTLAEYFK.I     |
| *               | 305.2540.2540.2 | 3.043  | 0.2851 | 1095.78 | 1095.289 | 5486.9 | 1                                                               | 556.4  | 81.2 | 1 K.RFPAFLTSR.Y                 |
| gj 55980750 ref | 1               | 1      | 5.40%  | 426     | 45694    | 6.3 U  | dihydroorotase (PyrC) [Thermus thermophilus HB8]                |        |      |                                 |
| *               | 306.2779.2779.3 | 4.5614 | 0.414  | 2483.5  | 2484.818 | 10443  | 1                                                               | 1736.1 | 37.5 | 1 K.RAGLPVTAEATPHHLTLTEEALR.T   |
| gj 55981305 ref | 1               | 2      | 5.00%  | 501     | 56774    | 9.6 U  | peptide ABC transporter oligopeptide-binding protein [Thermus   |        |      |                                 |
| *               | 306.2917.2917.3 | 5.7823 | 0.5152 | 2672.43 | 2673.047 | 5539   | 1                                                               | 1106.8 | 37.5 | 2 K.NPFAPILAHLTHSSTAIQSPTAIQR.L |
| gj 55981905 ref | 1               | 1      | 5.00%  | 398     | 44132    | 9.4 U  | glycerol-3-phosphate ABC transporter, periplasmic glycerol-3-ph |        |      |                                 |
| *               | 304.4566.4566.2 | 2.5671 | 0.315  | 2349.81 | 2348.706 | 8886.5 | 1                                                               | 328.1  | 34.2 | 1 R.FGLPNTSTPVLFYNLDFR.A        |
| gj 5000000151   | 2               | 6      | 4.40%  | 796     | 89275    | 4.8 U  | Translation: 131870..134260 (direct), 797 amino acids           |        |      |                                 |
| *               | 204.2860.2860.2 | 2.6266 | 0.3497 | 1426.08 | 1424.596 | 8359   | 1                                                               | 919.5  | 63.6 | 1 K.SNDIAEVFIPYR.Y              |



|                  |                 |        |        |         |          |        |   |                                                                                           |      |   |                              |
|------------------|-----------------|--------|--------|---------|----------|--------|---|-------------------------------------------------------------------------------------------|------|---|------------------------------|
| *                | 304.4005.4005.2 | 4.7868 | 0.4878 | 2542.65 | 2543.876 | 5574   | 1 | 794.7                                                                                     | 47.7 | 5 | K.VFSPISIDLSDPSNIQVYFSSVK.S  |
| gj 5000000069    | 1               | 2      | 4.20%  | 236     | 27414    | 5.1    | U | Translation: 59782..60492 (reverse), 237 amino acids                                      |      |   |                              |
| *                | 303.2439.2439.2 | 3.2387 | 0.2654 | 1203.1  | 1202.399 | 5844   | 1 | 726.3                                                                                     | 77.8 | 2 | K.RGIPDFVIER.Y               |
| gj 55981182 ref\ | 1               | 2      | 3.90%  | 562     | 60981    | 6.7    | U | acetolactate synthase, large subunit [Thermus thermophilus HB8]                           |      |   |                              |
| *                | 302.2927.2927.2 | 3.2125 | 0.315  | 2281.68 | 2279.61  | 10187  | 1 | 1350.6                                                                                    | 50   | 2 | R.ALIGTDAFQEADVGTGVTMPITK.H  |
| gj 5000000141    | 3               | 3      | 3.80%  | 1014    | 111507   | 9.2    | U | Translation: 120953..123997 (reverse), 1015 amino acids                                   |      |   |                              |
| *                | 303.4328.4328.3 | 3.8008 | 0.351  | 2337.6  | 2337.592 | 7309.7 | 1 | 1429                                                                                      | 44.7 | 1 | R.NTQQLIETLQQLEYSVSSVR.R     |
| *                | 303.4340.4341.2 | 5.8502 | 0.5257 | 2337.61 | 2337.592 | 9742.4 | 1 | 2210.4                                                                                    | 65.8 | 1 | R.NTQQLIETLQQLEYSVSSVR.R     |
| *                | 303.2335.2335.2 | 2.6927 | 0.419  | 2091.32 | 2089.269 | 4339.3 | 1 | 191.3                                                                                     | 38.9 | 1 | R.VFPANQGFTEEYLGTSAR.L       |
| gj 55981843 ref\ | 2               | 4      | 3.80%  | 954     | 100494   | 5.4    | U | hypothetical protein TTHA1874 [Thermus thermophilus HB8]                                  |      |   |                              |
| *                | 103.2034.2034.2 | 3.4953 | 0.3685 | 1709.48 | 1709.894 | 3636   | 1 | 382.2                                                                                     | 56.7 | 1 | K.TLTNLEPGSYTVQASK.T         |
| *                | 107.2703.2703.2 | 4.9846 | 0.4416 | 2008.88 | 2009.351 | 4787.6 | 1 | 968.7                                                                                     | 60.5 | 3 | K.TTTVVLNLLPVAASPTEGK.V      |
| gj 55981621 ref\ | 1               | 1      | 3.80%  | 398     | 43092    | 9.3    | U | maltose ABC transporter, periplasmic maltose-binding protein [Thermus thermophilus HB8]   |      |   |                              |
| *                | 206.2695.2695.2 | 2.6197 | 0.2558 | 1514.32 | 1514.764 | 4941   | 6 | 333.5                                                                                     | 46.4 | 1 | K.VDFGIAPFPTPPGAK.N          |
| gj 5000000152    | 1               | 1      | 3.30%  | 703     | 81102    | 5      | U | Translation: 134253..136364 (direct), 704 amino acids                                     |      |   |                              |
| *                | 303.3537.3537.2 | 3.476  | 0.4235 | 2598.08 | 2599.813 | 7054.6 | 1 | 537.3                                                                                     | 38.6 | 1 | K.SYSGALETINNISLAEFYETYGR.E  |
| gj 55980058 ref\ | 1               | 1      | 3.20%  | 438     | 48632    | 7.5    | U | NADH-quinone oxidoreductase chain 1 [Thermus thermophilus HB8]                            |      |   |                              |
| *                | 305.2560.2560.2 | 3.0251 | 0.3917 | 1626.03 | 1624.898 | 4588.1 | 1 | 379.2                                                                                     | 57.7 | 1 | K.RPGVYELPMGTTFR.E           |
| gj 55981869 ref\ | 2               | 3      | 3.20%  | 281     | 31735    | 6.4    | U | NH(3)-dependent NAD(+) synthetase [Thermus thermophilus HB8]                              |      |   |                              |
| *                | 306.2611.2611.1 | 2.1163 | 0.1507 | 1089.21 | 1090.316 | 4881.8 | 1 | 319.2                                                                                     | 62.5 | 1 | R.VHALFLPHR.E                |
| *                | 306.2609.2609.2 | 3.3711 | 0.2665 | 1090.68 | 1090.316 | 5109.4 | 1 | 1249.7                                                                                    | 93.8 | 2 | R.VHALFLPHR.E                |
| gj 5000000080    | 1               | 3      | 2.90%  | 650     | 75157    | 5.1    | U | Translation: 80788..82740 (reverse), 651 amino acids                                      |      |   |                              |
| *                | 304.4034.4034.2 | 4.1658 | 0.4803 | 2187.46 | 2187.466 | 5025.1 | 1 | 984.8                                                                                     | 61.1 | 3 | R.GNSYLDPCPSLPSVLIFTR.D      |
| gj 5000000057    | 1               | 2      | 2.90%  | 616     | 69898    | 5      | U | Translation: 47564..49414 (direct), 617 amino acids                                       |      |   |                              |
| *                | 303.3368.3371.2 | 4.6717 | 0.3464 | 1874.05 | 1875.216 | 5758.6 | 1 | 786.2                                                                                     | 55.9 | 2 | R.SLGTINSFTPLEAAVILK.F       |
| gj 55981242 ref\ | 1               | 2      | 2.90%  | 578     | 63632    | 5.2    | U | V-type ATP synthase subunit A [Thermus thermophilus HB8]                                  |      |   |                              |
| *                | 104.1654.1654.2 | 2.8444 | 0.3217 | 1737.11 | 1738.185 | 8325.7 | 1 | 829.2                                                                                     | 50   | 2 | -.MIQGVILQKIAGPAVIAK.G       |
| gj 55981141 ref\ | 1               | 1      | 2.80%  | 819     | 91993    | 6.5    | U | alpha-glucan phosphorylase [Thermus thermophilus HB8]                                     |      |   |                              |
| *                | 305.3747.3747.2 | 3.1221 | 0.4079 | 2486.36 | 2486.853 | 7683.8 | 1 | 653.7                                                                                     | 40.9 | 1 | R.ALGLAPAFFHMNEGHS AFLGLER.L |
| gj 55980077 ref\ | 1               | 1      | 2.80%  | 651     | 71879    | 6.6    | U | transketolase [Thermus thermophilus HB8]                                                  |      |   |                              |
| *                | 302.3152.3152.2 | 3.1485 | 0.4175 | 1935.88 | 1934.153 | 6440   | 1 | 741.2                                                                                     | 50   | 1 | R.ISIDGPTDLAFTEDVLAR.Y       |
| gj 55980202 ref\ | 1               | 1      | 2.80%  | 464     | 49084    | 6.9    | U | pyruvate dehydrogenase complex, dihydrolipoamide dehydrogenase [Thermus thermophilus HB8] |      |   |                              |
| *                | 306.2682.2682.2 | 2.9741 | 0.3071 | 1454.49 | 1454.715 | 6750.5 | 1 | 739.1                                                                                     | 70.8 | 1 | K.ALLHAAETLHHLK.V            |
| gj 5000000149    | 1               | 6      | 2.60%  | 662     | 75908    | 5.3    | U | Translation: 127979..129967 (direct), 663 amino acids                                     |      |   |                              |
| *                | 304.4463.4463.2 | 4.861  | 0.5656 | 2031.14 | 2032.343 | 7491   | 1 | 1542.6                                                                                    | 68.8 | 6 | R.IAIPFDLDEVYANYFK.I         |
| gj 55980044 ref\ | 1               | 2      | 0.70%  | 2202    | 243290   | 7.7    | U | ribonucleoside-diphosphate reductase [Thermus thermophilus HB8]                           |      |   |                              |
| *                | 306.2701.2701.2 | 3.6353 | 0.3914 | 1756.34 | 1757.005 | 8103.3 | 1 | 1170.2                                                                                    | 64.3 | 2 | R.VFLSAHDIHPLDHVR.M          |
